# 1 Probing molecular specificity with deep sequencing 2 and biophysically interpretable machine learning

3 H. Tomas Rube<sup>a,b</sup>, Chaitanya Rastogi<sup>b</sup>, Siqian Feng<sup>c,†</sup>, Judith F. Kribelbauer<sup>b,†</sup>, Allyson  
4 Li<sup>d,†</sup>, Basheer Becerra<sup>b</sup>, Lucas A. N. Melo<sup>b</sup>, Bach Viet Do<sup>b</sup>, Xiaoting Li<sup>b</sup>, Hammaad H.  
5 Adam<sup>b</sup>, Neel H. Shah<sup>d</sup>, Richard S. Mann<sup>c</sup>, and Harmen J. Bussemaker<sup>b,\*</sup>

6 <sup>a</sup>Department of Bioengineering, University of California, Merced

7 <sup>b</sup>Department of Biological Sciences, Columbia University

8 <sup>c</sup>Department of Biochemistry and Molecular Biophysics, Columbia University

9 <sup>d</sup>Department of Chemistry, Columbia University

10 <sup>†</sup>These authors contributed equally

11 <sup>\*</sup>[hjb2004@columbia.edu](mailto:hjb2004@columbia.edu)

## 12 ABSTRACT

Quantifying sequence-specific protein-ligand interactions is critical for understanding and exploiting numerous cellular processes, including gene regulation and signal transduction. Next-generation sequencing (NGS) based assays are increasingly being used to profile these interactions with high-throughput. However, these assays do not provide the biophysical parameters that have long been used to uncover the quantitative rules underlying sequence recognition. We developed a highly flexible machine learning framework, called ProBound, to define sequence recognition in terms of biophysical parameters based on NGS data. ProBound quantifies transcription factor (TF) behavior with models that accurately predict binding affinity over a range exceeding that of previous resources, captures the impact of DNA modifications and conformational flexibility of multi-TF complexes, and infers specificity directly from *in vivo* data such as ChIP-seq without peak calling. When coupled with a new assay called Kd-seq, it determines the absolute affinity of protein-ligand interactions. It can also profile the kinetics of kinase-substrate interactions. By constructing a biophysically robust foundation for profiling sequence recognition, ProBound opens up new avenues for decoding biological networks and rationally engineering protein-ligand interactions.

## 14 Introduction

15 Gene regulatory and signal transduction networks rely on sequence-specific molecular recognition to guide con-  
16 stituent proteins to preferentially bind to or chemically modify specific nucleic-acid or amino-acid ligands or  
17 substrates. These interactions often span orders of magnitude in strength and are modulated not only by sequence,  
18 but also by other *in vivo* effects such as competition, cooperation, saturation and chemical modifications<sup>1</sup>. As even  
19 weak ligands can be functional<sup>2-4</sup>, comprehensive and accurate profiling of sequence recognition is essential to  
20 decode these networks.

21 Sequence-specific interactions are most appropriately described in terms of biophysical parameters such as  
22 equilibrium constants and reaction rates. Sequence recognition models, which often take the form of position-specific  
23 scoring matrices<sup>5</sup>, encode how a protein recognizes any sequence and have proven useful for predicting binding  
24 targets and the impact of genetic variation<sup>1</sup>. However, in their current form, they fall short of predicting actual  
25 biophysical constants. To build truly quantitative recognition models, we need improved algorithms along with  
26 high-quality datasets to train them.

27 In recent years, NGS has dramatically increased the throughput with which molecular interactions can be  
28 probed. In particular, high-throughput methods coupling NGS with *in vitro* selection on random ligand pools have  
29 emerged as powerful and flexible tools for the unbiased profiling of sequence recognition. This includes SELEX  
30 methods for TFs<sup>6-16</sup> and RNA-binding proteins<sup>17,18</sup>, as well as protein display methods for proteases<sup>19</sup> and T-cell  
31 receptors<sup>20</sup>. Transforming the resulting sequencing reads into quantitative recognition models remains challenging,

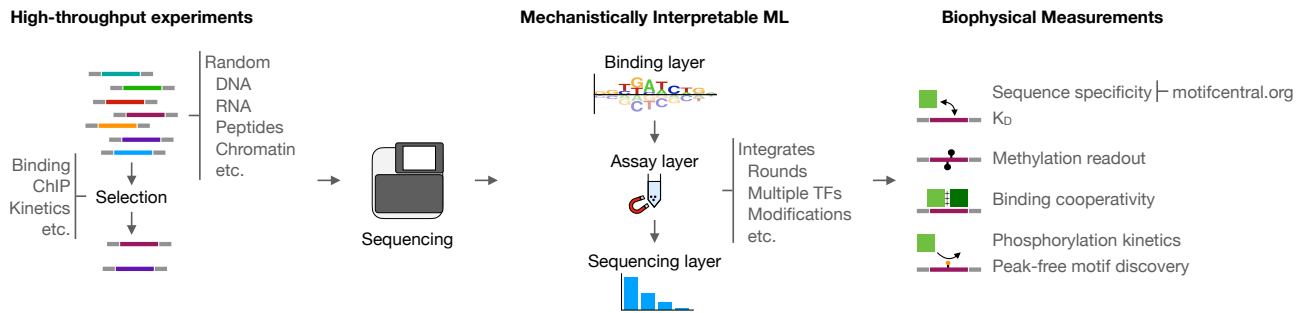

Figure 1: **Overview of the ProBound method.** A range of high-throughput experiments utilize selection on random DNA, RNA and displayed protein libraries coupled with NGS to characterize sequence-specific molecular interactions. ProBound uses machine learning tailored to model the recognition, selection, and sequencing processes in such experiments to infer biophysically meaningful sequence recognition models from a wide range of NGS data.

32 as the biophysical properties are only indirectly encoded in the sequencing reads. Moreover, randomized ligand  
33 pools can be extremely complex and even the best sequences can go unobserved. There is currently no general  
34 method that systematically addresses these issues.

35 Here, we solve this problem with a flexible machine learning framework, called ProBound, capable of learning  
36 biophysically interpretable recognition models from a wide range of sparse NGS data. It can quantify relative  
37 affinities, absolute dissociation constants, cooperativity, methylation sensitivity, and enzymatic parameters by  
38 analyzing data from various *in vivo* or *in vitro* assays covering DNA, RNA, or protein ligands. The resulting  
39 binding models are highly accurate, as illustrated by their superior performance relative to existing resources. While  
40 current methods support elements of these features<sup>21–25</sup>, ProBound allows for unprecedented quantitative rigor and  
41 generality.

## 42 Results

### 43 The ProBound framework

44 ProBound uses three layers to systematically model NGS data (Figure 1; Methods): a *binding layer* that predicts the  
45 binding free energy or enzymatic efficiency from sequence; an *assay layer* that predicts the post-selection frequency  
46 of a ligand; and a *sequencing layer* that represents the stochastic sampling of DNA reads during deep sequencing.  
47 Together, these elements are combined in a likelihood function that aims to explain the observed distribution of read  
48 counts across multiple selection rounds or conditions in terms of the sequence features of the ligand. Each layer is  
49 easily extensible; for example, the binding layer can model TF complexes by accommodating multiple recognition  
50 models and their interactions. Flexibility in the assay layer enables the modeling of alternative selection processes  
51 (e.g. catalysis) and the utilization of multiple assays to measure more complex phenomena (e.g. cooperativity).

### 52 A compendium of accurate TF binding models

53 Our initial objective was to analyze thousands of published SELEX datasets<sup>9,10,12,14,15,26–28</sup> and produce high-  
54 quality TF binding models that capture low-affinity binding, an important yet difficult-to-detect gene regulatory  
55 phenomenon<sup>2–4,22</sup>. This required us to quantify TF sequence recognition over a wide affinity range, rather than  
56 merely classify sequences as “bound” or “unbound”. We therefore assembled a training database of 2,124 published  
57 SELEX datasets and designed a computational pipeline to uniformly build binding models (Figure 2a; Supplemental  
58 Table 1; Methods). To assess the generalization performance of our models, we linked each TF to published  
59 protein binding microarray (PBM), ChIP-seq, and non-training SELEX data. We computed three complementary  
60 performance metrics: meaningful affinity fold-range (MAFR), a new metric that provides a conservative bound  
61 on the ability of a model to detect low-affinity binding;  $R^2$ , the fraction of signal variance explained by the model;  
62 and area under the precision-recall curve (AUPRC), a common metric<sup>22,25,29,30</sup> for quantifying how well a model

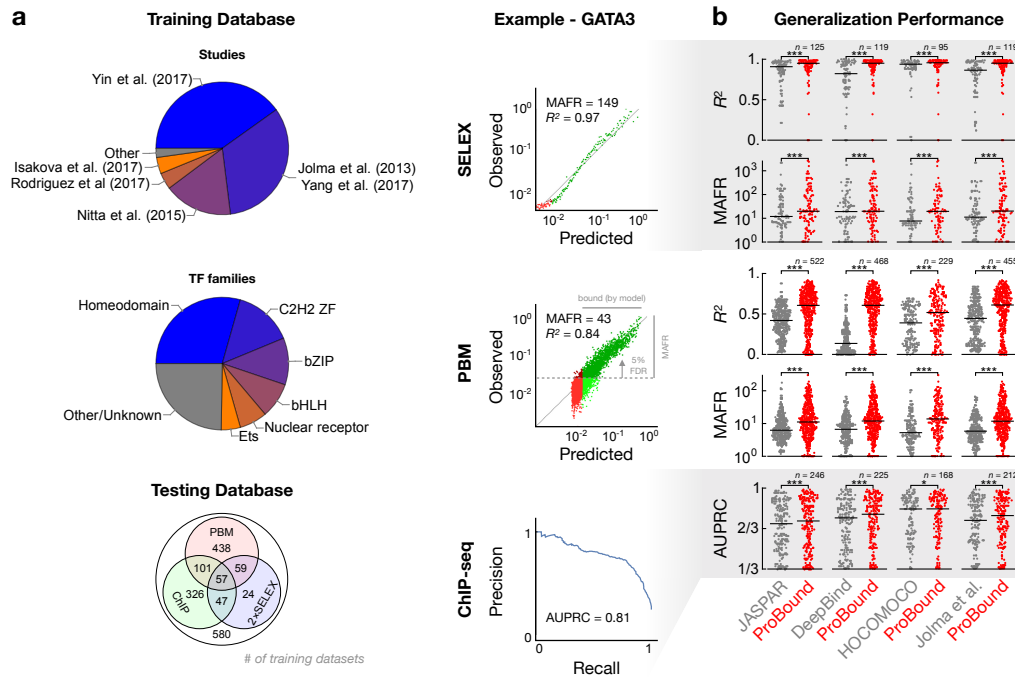

**Figure 2: Validation of TF binding model performance.** (a) Breakdown of the training dataset used to build recognition models by originating study and TF family (pie charts) and by availability of testing data used to evaluate them (Venn diagram). Representative SELEX (top) and PBM (middle) comparisons of observed and model-predicted binding signals used to quantify generalization performance. Each point in the scatter plots corresponds to either 500 SELEX probes or 10 PBM probes; green indicates where the model predicts binding above an estimated baseline (see Methods), while darker points indicate the meaningful affinity fold-range (MAFR) of observed binding signal over which at most 5% of predicted binding was below the baseline. Representative precision-recall curve (bottom) for the ChIP-seq peak classification task used to quantify model performance in terms of AUPRC. (b) Performance comparison of ProBound models vs. popular existing resources. For each ProBound and resource model pair (points), the average score was computed for all matching testing datasets. Horizontal bars indicate median performance. Significance was computed using the Wilcoxon signed-rank test.

63 classifies genomic regions as bound or unbound as determined by ChIP-seq peaks<sup>31</sup>. We used these to benchmark our  
 64 models to those in major resources, linking all JASPAR<sup>32</sup>, DeepBind<sup>30</sup>, HOCCOMOCO<sup>33</sup>, and Jolma et al. (2013)<sup>26</sup>  
 65 models by TF. On average, ProBound outperformed these resources across all metrics (Figure 2b), with the PBM and  
 66 SELEX metrics displaying the largest improvement. The less notable improvement in AUPRC is likely due to bias  
 67 towards high-affinity sequences in ChIP-seq peaks, for which accurate low-affinity predictions are less relevant<sup>22</sup>.  
 68 Below, we will introduce an alternative method for analyzing ChIP-seq data that eliminates the need for ChIP-seq  
 69 peak discovery.

70 Over the years, a number of TFs have been assayed many times by different research groups and SELEX  
 71 platforms. We reasoned that jointly analyzing such data would produce a “consensus” model focused on the true  
 72 binding signal rather than platform-specific biases (Figure S1a). Encouragingly, such consensus models displayed  
 73 significantly improved performance when compared to traditional single-experiment models (Figure S1b), indicating  
 74 that multi-experiment analysis can improve binding predictions. Finally, to facilitate adoption by other researchers,  
 75 we have made a curated version of our models, comparative analyses, and computational tools readily available  
 76 through a comprehensive resource at [motifcentral.org](http://motifcentral.org).

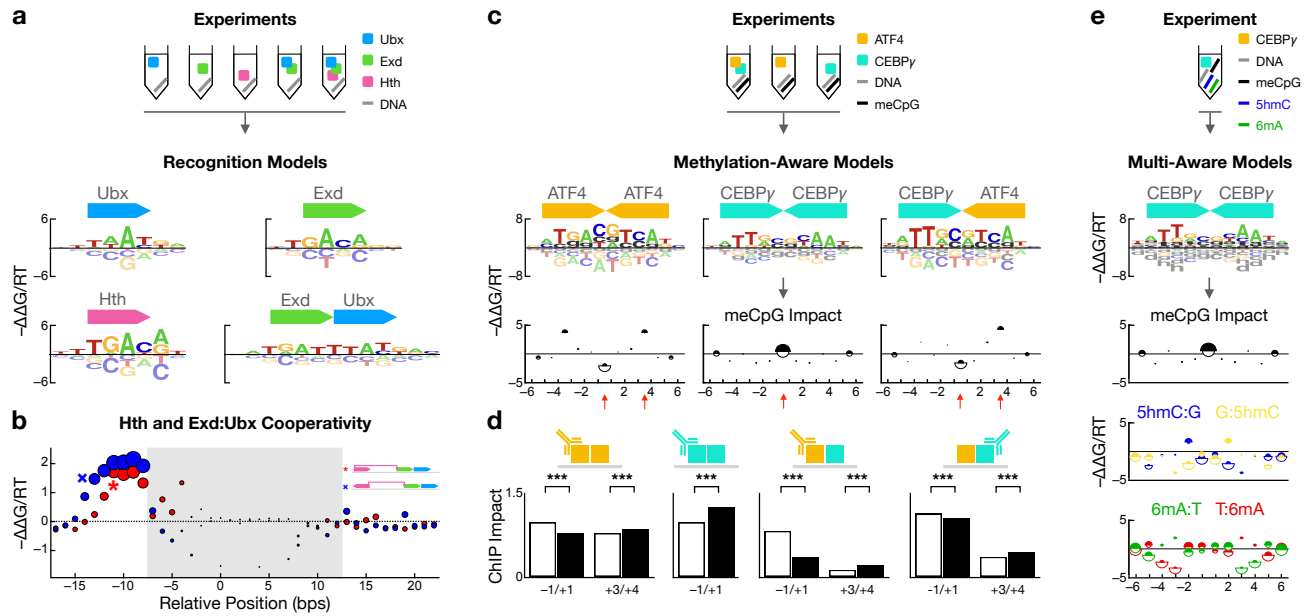

**Figure 3: Integrated modeling of complementary assays quantifies the impact of methylation and co-factors on TF binding.** (a) Combinations of TFs assayed (top) and unified model learned by ProBound (bottom). The model consists of the inferred energy logos for the monomeric and dimeric complexes (motifs) and the (b) inferred binding cooperativity (y-axis) between Hth and Exd:Ubx for different relative positions (x-axis) and orientations (red: parallel; blue: anti-parallel) of the subunits. Disk areas proportional to the affinity of the strongest predicted sequence highlight the most stable configurations. Shaded region indicates overlapping motifs. Schematics (inset) illustrate two configurations indicated on the plot. (c) Combinations of TFs and methylated/unmethylated libraries assayed (schematic); methylation-aware binding models (motifs) using the alphabet in Figure S3a; and impact of meCpG on binding free energy (plots;  $-\Delta\Delta G_{CpG \rightarrow meCpG}/RT$  on y-axis) as a function of position within the binding site (x-axis). Half-disk areas are proportional to the maximum affinity when either CpG (white) or meCpG (black) is substituted at the corresponding position in the highest-affinity sequence and highlight positions with high-affinity methylation readout. (d) Impact of substituting a CpG (white) or meCpG (black) at a specific position in the highest-affinity binding site as quantified using ChIP-seq data. Each pair of bars corresponds to a substitution at a specific position and to red arrows in (c). Antibody symbols indicate respective immunoprecipitated factor. Asterisks indicate significance computed using an *F*-test (see Methods and Supplemental Table 2). (e) Same as (c) for data simultaneously measuring methylation readout for meCpG, 5hmC, and 6mA modifications.

## 77 Quantifying TF binding cooperativity

78 Variables beyond sequence, such as co-factor interactions and DNA methylation, significantly influence TF behavior  
 79 *in vivo*, and therefore, TF binding models must account for them in order to improve binding predictions. We first  
 80 focused on co-factors, which modulate TF binding in a cell-type-specific manner. Despite the growing number of  
 81 SELEX assays characterizing TF complexes<sup>9,11,34</sup>, it remains a challenge to quantify sequence recognition in a  
 82 way that clearly separates the contributions from many potential TF complexes and their various internal structural  
 83 configurations – a problem that grows exponentially with the number of factors assayed. In a novel approach that  
 84 builds upon our multi-experiment framework, we measure subunit binding specificity and cooperativity by explicitly  
 85 modeling the allowed complexes in multiple SELEX datasets that probe different TF combinations.

86 We first applied this method on the complex formed by three highly conserved *Drosophila* homeodomain  
 87 proteins: Homothorax (Hth), Extradenticle (Exd) and Ultrabithorax (Ubx). Previous studies showed that Ubx and  
 88 Exd form fixed-spacer heterodimers<sup>10,22</sup> and that Hth uses multiple relative spacings to bind cooperatively with  
 89 similar heterodimers<sup>34</sup>. To characterize Hth:Exd:Ubx, we first performed SELEX-seq with all three factors and then

90 analyzed these data in conjunction with our previous monomer and heterodimer data (Figure 3a, S2a). Importantly,  
91 we modeled the ternary complex with two subunits representing Hth and Exd:Ubx; the total binding energy was the  
92 sum of their independent binding specificities and of a cooperativity term that depended on their relative position  
93 and orientation.

94 The resulting model revealed significant cooperativity ( $\Delta\Delta G_{\text{config}} \approx 2RT$ ) when Hth binds 8-13 bps upstream of  
95 Exd:Ubx (Figure 3b), which, along with our monomer and heterodimer models, mirrored our previous results<sup>22,34</sup>.  
96 While a larger spacing is tolerated when Hth is reversed, cooperativity is lost when Hth binds far away from the  
97 Exd:Ubx half-site, regardless of orientation. As expected, selection in the Hth-Exd-Ubx experiment was driven by  
98 multiple subcomplexes with alternate spacing preferences (Figure S2b), underscoring the need to simultaneously  
99 model all preferences. As a further test, we reanalyzed published data for POU2F:GSC2 and GCM1:ELK1 in  
100 combination with matched monomer data<sup>11,26</sup>. In both cases, strong binding cooperativity was detected at a specific  
101 relative offset (Figure S2c, d).

## 102 Learning methylation-aware TF binding models

103 Next, we focused on another variable affecting *in vivo* binding: DNA methylation. Chemical modifications to DNA,  
104 such as fully methylated CpG dinucleotides (meCpG), are common epigenetic marks that can alter TF binding, and  
105 thus, gene regulation<sup>35-38</sup>. Unlike existing methods that compare methylated and normal SELEX libraries to detect  
106 TF “methylation readout” at the level of enriched subsequences<sup>14,16,39</sup>, we used ProBound with an extended alphabet  
107 (Figure S3a, Methods) and our multi-experiment framework to learn methylation-aware binding models that resolve  
108 the position-specific impact of methylation ( $\Delta\Delta G_{\text{CpG} \rightarrow \text{meCpG}}$ ), enabling binding predictions to any (un)methylated  
109 sequence.

110 We tested this approach by simultaneously uncovering the effect of meCpG on the ATF4:CEBP $\gamma$  heterodimer  
111 while controlling for the confounding influence of their respective homodimers. Using data for all combinations of  
112 ATF4/CEBP $\gamma$  and normal/methylated DNA (Figure S3b), we simultaneously learned methylation-aware binding  
113 models for all three dimers (Figure 3c, Methods). These predict methylation induced stabilization/destabilization  
114 patterns (Figure 3c, S3c) consistent with previous analyses of the ATF4 homodimer<sup>15</sup> and similar to those of  
115 the related CEBP $\beta$  homodimer<sup>15</sup> and ATF4:CEBP $\beta$  heterodimer<sup>39</sup>. Strikingly, ATF4 overrides CEBP $\gamma$  to retain  
116 its methylation readout at the central position of the heterodimer complex. Importantly, we used ChIP-seq data  
117 to estimate the impact of these position-specific methylation sensitivities *in vivo*, and found that methylation  
118 significantly affected binding in the direction predicted by our models (Figure 3d, Methods).

119 Other DNA modifications, such as N<sup>6</sup>-methyladenine (6mA) and 5-hydroxymethylcytosine (5hmC), can also be  
120 functional<sup>40-45</sup>. To characterize their impact, we extended the EpiSELEX-seq protocol to assay multiple sub-libraries  
121 simultaneously: unmethylated, meCpG, 5hmC, and 6mA (Figure 3e and S4a). Not only is this simpler than assaying  
122 each methylation mark separately, it also reduces experimental error. Repeating the binding assay for CEBP $\gamma$  and  
123 jointly analyzing all four libraries reveals significant and distinct stabilization/destabilization patterns for both 5hmC  
124 and 6mA (Figure 3e and S4b). Notably, the inferred meCpG methylation sensitivity is identical to what we found  
125 above. These results illustrate both the scalability of our approach and the impact 5hmC and 6mA can have on  
126 binding.

## 127 Measuring absolute binding constants using SELEX

128 While we have focused on quantifying binding specificity in terms of relative affinities, knowledge of *absolute*  
129 affinities is necessary for predicting equilibrium occupancy and for comparing different TFs on a common scale.  
130 Fundamentally, SELEX assays probe *relative* ligand frequencies, and so far, have only been used to estimate *relative*  
131 affinities. To overcome this limitation, we developed a novel assay called  $K_D$ -seq. It uses ProBound to jointly analyze  
132 the input, bound, and free probes from a selection round and produce both a specificity model and an estimate of the  
133 absolute dissociation constant ( $K_D$ ) for a reference sequence. Intuitively,  $K_D$ -seq uses a sum rule to relate the relative  
134 ligand frequencies of the three libraries and convert them to absolute binding probabilities (Figure 4a, Methods).

135 We initially tested  $K_D$ -seq using the *Drosophila* homeodomain protein Distal-less (Dll) at low DNA and TF  
136 concentrations (100nM and 20nM, respectively) to achieve strong enrichment and avoid excessive binding saturation.

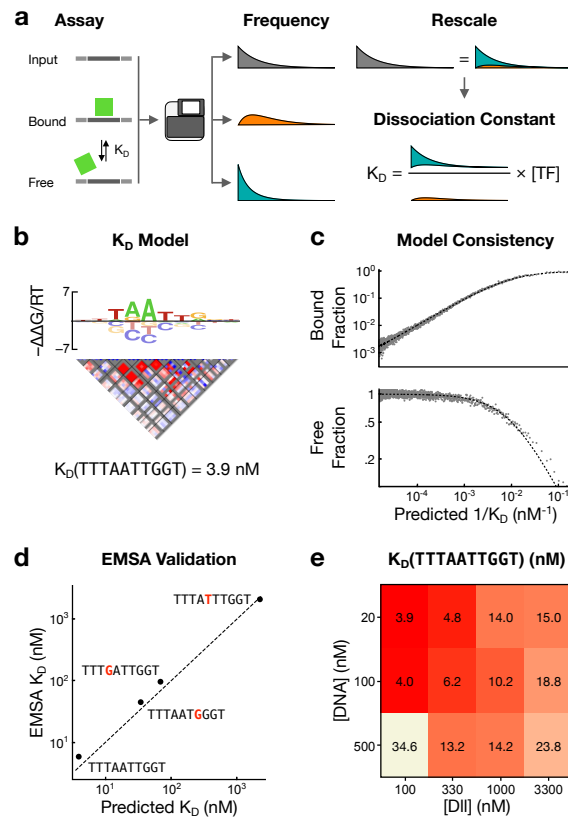

Figure 4: **ProBound infers absolute  $K_D$  values.** (a) Schematic overview of the  $K_D$ -seq method. After a TF is incubated with a randomized DNA library, the bound, free, and input probes are sequenced, measuring the relative probe frequencies in each fraction. This can be used to estimate the absolute binding probabilities (and hence  $K_D$ ) with a sum rule that relates the three frequencies. (b)  $K_D$  model for Dll consisting of a specificity model with an energy logo (top) and an interaction matrix (middle), which together predict the relative binding affinity, and the absolute  $K_D$  for a reference sequence (bottom). The interaction plot shows stabilizing (red) and destabilizing (blue) corrections to the energy logo for each pair of positions (boxes) and bases (pixels) in the logo. Gray indicates prohibited corrections. Model generated from data where  $[\text{Dll}] = 100\text{nM}$  and  $[\text{DNA}] = 20\text{nM}$ . (c) Comparison of the predicted  $K_D^{-1}$  (x-axis) and observed probe fractions (y-axis) in the bound (top) and free (bottom) libraries. Points represent the average observed fraction for 500 probes binned by predicted  $K_D$ . Dashed line indicates expected value assuming equilibrium binding model. (d) Comparison between EMSA-measured (y-axis) and model-predicted (x-axis)  $K_D$  values for four probes. (e)  $K_D$  of the sequence TTTAATTGGT as estimated by  $K_D$ -seq for different Dll and DNA concentrations.

137 The resulting model (Figure 4b) accurately predicted enrichment in the bound and free libraries over three orders of  
 138 magnitude in  $K_D$  (Figure 4c). For validation, we measured the  $K_D$  values of the optimal model-predicted binding  
 139 site and three suboptimal sequences using EMSA and found excellent quantitative agreement (Figure 4d). We  
 140 then confirmed the robustness of  $K_D$ -seq affinity measurements by repeating the assay at different TF and DNA  
 141 concentrations (Figure S5a). The resulting specificity models were virtually identical (pairwise  $r^2$  for  $\Delta\Delta G$  ranging  
 142 from 0.974-0.998), with the fraction of bound DNA changing as expected (Figure S5b). While the estimated  $K_D$   
 143 of the highest-affinity sequence was robust in many conditions, it shifted at extremely high TF concentrations  
 144 ( $\sim 600$ -fold above EMSA-measured  $K_D$ ) or when DNA concentration was significantly above that of the TF (Figure  
 145 4e).

146 ProBound can also learn  $K_D$  models by jointly analyzing the bound and input libraries of multiple SELEX  
 147 experiments at different TF concentrations. Intuitively, this approach leverages saturation effects to determine the

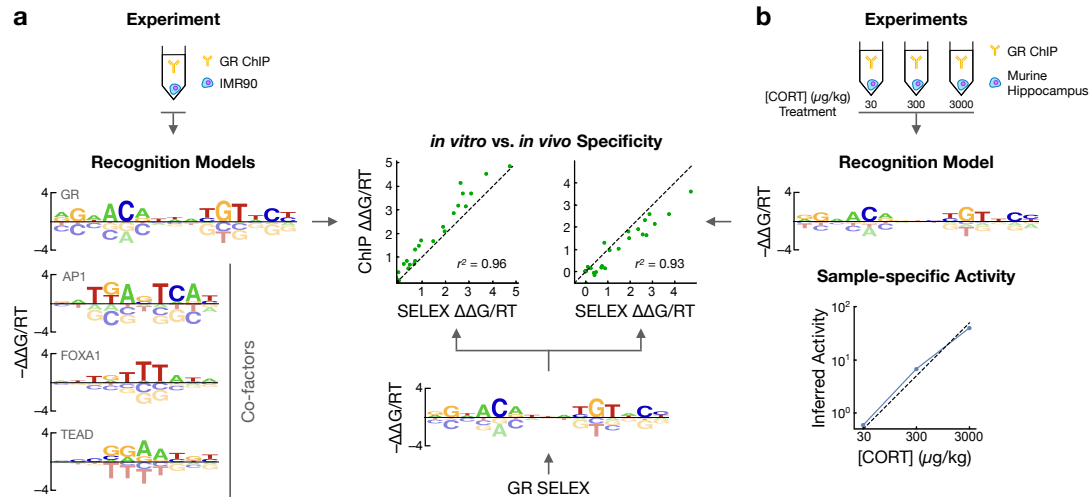

Figure 5: **ProBound learns quantitative binding models and sample-specific activities using peak-free ChIP-seq analysis.** (a) Binding models for GR and three co-factors (left) learned from GR ChIP-seq data from the IMR90 cell line<sup>47</sup> and for GR from a SELEX dataset (center). The scatterplot compares the energy coefficients learned from ChIP-seq (y-axis) and SELEX (x-axis) data<sup>9</sup>. (b) Combined specificity (top) and sample-specific binding activity (bottom) model learned by jointly analyzing three GR ChIP-seq datasets after treatment with 30, 300, or 3000 μg/kg of corticosterone (CORT)<sup>48</sup>. The scatterplot (left) compares the energy coefficients as in (a).

148 absolute affinity scale. For Dll, the  $K_D$  models from the two approaches are very similar (Figure S5a,c-d). When  
 149 applied to multi-concentration RNA Bind-N-seq<sup>18</sup> data for RBFOX2, the resulting  $K_D$ -model captured the observed  
 150 transition from linear to saturated selection in the experiments (Figure S5f). Finally, we note that ProBound can  
 151 estimate relative affinities using only the free and bound libraries, as in the Spec-seq<sup>46</sup> assay (Figure S5e).

## 152 Peak-free motif discovery from ChIP-seq data

153 While the preceding analyses have focused on quantifying the impact of co-factors and TF concentration on *in*  
 154 *vitro* binding, we also wished to learn their *in vivo* impact directly from ChIP-seq data. Standard motif discovery  
 155 algorithms aim to discover overrepresented sequences within discrete genomic regions – identified by “peak callers”  
 156 – that harbor a statistically significant enrichment of ChIP-seq reads. Peak calling is useful for identifying the most  
 157 prominent genomic binding sites, but it ignores information about cis-regulatory logic contained within more weakly  
 158 bound regions. We hypothesized that by directly modeling the enrichment between the input and ChIP libraries,  
 159 ProBound can extract such information even from weakly enriched regions.

160 To test this approach, we used ProBound to discover the factors driving the selection in glucocorticoid receptor  
 161 (GR) ChIP-seq data from the IMR90 cell line<sup>47</sup> (see Methods). It found four binding models: one consistent with the  
 162 GR consensus sequence<sup>49,50</sup> and three others consistent with known GR co-factors AP-1, FOXA1, and TEAD<sup>47,51</sup>  
 163 (Figure 5a). Inspired by our multi-concentration analysis above, we next set out to quantify the impact the nuclear  
 164 concentration of a TF can have on binding. We did so by jointly analyzing multiple ChIP-seq datasets that probe  
 165 GR binding in the murine hippocampus after treatment with varying levels of corticosterone (CORT)<sup>48</sup>, an agonist  
 166 that increases the nuclear concentration of GR (Figure 5b). The resulting model captured sample-specific activity  
 167 parameters reflective of GR nuclear concentration that were proportional to CORT concentration (Figure 5b).

168 It should be noted that both these models were constructed on data that was intentionally downsampled to less  
 169 than one mapped read per kb of genomic sequence on average. Thus, even when peak discovery is ineffective,  
 170 ChIP-seq data clearly contain sufficient information to reliably infer TF binding models, capture the influence of  
 171 co-factors, and quantify biologically meaningful cell state parameters. Significantly, the free-energy parameters of  
 172 both GR binding models showed striking agreement with those from a model trained on *in vitro* data<sup>9</sup> ( $r^2 = 0.96$   
 173 and  $r^2 = 0.93$ , respectively; Figure 5a, b), suggesting that *in vitro* and *in vivo* observations of binding specificity can,

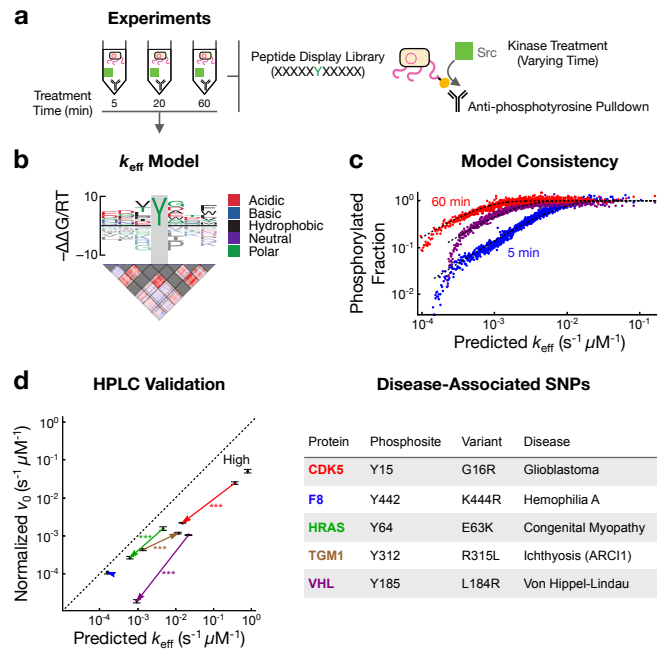

Figure 6: **ProBound quantifies sequence-dependent kinetics of the tyrosine kinase c-Src.** (a) Schematic overview of the bacterial display assay used to profile the sequence specificity of the tyrosine kinase c-Src. (b)  $k_{\text{eff}}$  model for c-Src with an energy logo (top) and an interaction matrix (bottom) trained on data from 5, 20 and 60 minutes of exposure. The central position of the model was fixed to recognize tyrosine (gray). (c) Comparison of the predicted  $k_{\text{eff}}$  (x-axis) and phosphorylated fraction (y-axis) for 5 (blue), 20 (purple) and 60 minutes (red) of exposure to c-Src. Points represent the average observed phosphorylated fraction for 500 probes binned by predicted  $k_{\text{eff}}$ . Dashed lines indicate expected value according to model. (d) Comparison of the HPLC-measured normalized initial phosphorylation rate  $v_0$  (y-axis,  $n = 3$  technical replicates) and the model-predicted  $k_{\text{eff}}$  (x-axis) for five disease-associated WT/MUT SNP pairs (arrows) and a peptide predicted to have high activity (table and Supplemental Table 3). The concentration of c-Src was 500 nM and that of the substrate peptide was 100  $\mu\text{M}$ . Error bars indicate the standard error of the mean and asterisks indicate significance computed using a two-sided  $t$ -test.

174 in fact, be highly concordant.

### 175 Profiling tyrosine kinase kinetics

176 Biological processes that employ sequence-specific protein-protein interactions are increasingly being studied with  
 177 display assays utilizing diverse DNA-templated protein libraries<sup>19,20,52</sup>. While these methods are profiling these  
 178 interactions more comprehensively than ever before, interpreting the data remains challenging for many of the same  
 179 reasons as above. Furthermore, current analytical methods tend to focus on detecting enriched sequence features  
 180 rather than explicitly estimating binding constants or enzymatic parameters. Given the similarities with SELEX  
 181 assays, we were motivated to use ProBound to characterize protein sequence recognition.

182 As a proof-of-concept, we focused on a process critical to many signal transduction pathways in the cell –  
 183 the phosphorylation of tyrosine residues on proteins. Recently, the substrate sequence preferences of several  
 184 tyrosine kinases were surveyed with a bacterial display library containing thousands of known kinase targets<sup>53</sup>. To  
 185 comprehensively profile the preferences for one of these kinases, c-Src, in an unbiased way, we repeated the assay  
 186 with a new library design that randomizes ten amino-acid residues around a fixed central tyrosine and exposed this  
 187 library to c-Src for varying durations (Figure 6a; Methods). After sequencing, we jointly analyzed all time points  
 188 to learn a model that predicts the sequence-specific catalytic efficiency  $k_{\text{eff}}$ , a simple metric that is often used  
 189 to compare different substrates against a single enzyme. Visualizing the inferred efficiency model as a sequence logo  
 190 (Figure 6b) revealed a position-specific pattern of favorable residues that were consistent with the earlier study<sup>53</sup>.



191 The model also accurately captures the observed fraction of phosphorylated peptides over a 100-fold range in  $k_{\text{eff}}$  for  
192 all three time points (Figure 6c).

193 To validate the model, we used high-performance liquid chromatography (HPLC) to measure the phosphorylation  
194 rates for eleven peptides. As genetic variants can significantly impact phosphorylation rates<sup>54</sup>, we used the PTMVars  
195 database<sup>55</sup> to find four disease-associated SNPs predicted by our ProBound model to have a large allelic difference.  
196 Indeed, measurements of their normalized initial phosphorylation rate differed significantly in the direction predicted  
197 by the model (Figure 6d). In addition, there was no measurable difference for a SNP predicted to cause only a  
198 small allelic difference for the F8 protein, and a model-generated high-efficiency peptide (Src-high) was indeed the  
199 highest. Significantly, these predictions tracked measurements over three orders of magnitude in  $k_{\text{eff}}$ , suggesting that  
200 ProBound is a powerful new tool for quantifying enzyme specificity.

## 201 Discussion

202 A major goal of this study was to rigorously estimate biophysical parameters from NGS data using machine learning.  
203 While biochemists have measured such parameters for decades, these measurements are generally low-throughput.  
204 By contrast, high-throughput sequencing-based analysis tends to focus on the detection of enrichment patterns that  
205 only indirectly reflect these quantities. Moreover, modern machine learning methods such as deep neural networks  
206 tend to yield highly overparametrized black box models whose parameters have no direct biophysical meaning. Here,  
207 we showed that by explicitly modeling the assay process, we can use machine learning to turn DNA sequencers into  
208 virtual measurement devices that accurately quantify biophysical parameters. Molecular biologists and computer  
209 scientists often address the same question using very different language; for instance, classifier performance and  
210 binding free energies are both used to quantify sequence recognition. We hope that approaches such as ours help  
211 keep the literature more coherent and inspire direct experimental validation of algorithm performance.

212 Central to our approach is the observation that some quantities cannot be estimated through pairwise enrichment  
213 analysis but only through more structured integration of complementary data. One example is our combinatorial  
214 approach to the separation of different TF complexes, which we also extended to methylation-aware binding models.  
215 Another is how analyzing the bound, free, and input fractions jointly – not pairwise – allows absolute affinities to be  
216 measured. Our approach is reminiscent of more traditional biochemical assays, which collect data across different  
217 time points, concentrations, or fractions, and use curve fitting to estimate constants. As we study increasingly  
218 complex aspects of sequence recognition — such as the combined impact of sequence, co-factors, DNA methylation,  
219 and TF concentrations, or the integration of *in vitro* and *in vivo* perspectives — we foresee that rigorous integration of  
220 complementary data along the lines that we have sketched here will become increasingly important. More generally,  
221 we anticipate that the accurate and unbiased profiling of sequence recognition that ProBound enables will have  
222 numerous applications in areas of biotechnology where the rational engineering of ligands is critical.

## 223 Methods

### 224 Overview of the algorithm

225 For each experiment, the data consists of a count table enumerating the probes in each SELEX round. The core of  
 226 the algorithm is a statistical model of the experiment that defines the likelihood of a set of model parameters given  
 227 the count table. On a high level, this likelihood is computed by first defining the probability that each probe is bound  
 228 in terms of its sequence, then predicting the probe frequencies in each library using a cumulative selection function,  
 229 and finally modeling the stochastic sampling of sequencing. The model parameters are estimated from the data  
 230 through numerical maximization of the likelihood.

### 231 Probabilistic motivation of the binding model

The binding model defines the probability that a probe is bound:

$$P_{\text{bound}} = \frac{Z_{\text{bound}}}{1 + Z_{\text{bound}}}. \quad (1)$$

Here  $Z_{\text{bound}}$  is the partition function, which can be thought of as a weighted sum over microscopic states. Assuming that at most two protein molecules are bound to the probe, the partition function is given by

$$Z_{\text{bound}} = \sum_a \sum_x \frac{[P_a]}{K_{D,a}(S_x)} + \sum_{a,b} \sum_{x,y} \frac{[P_a][P_b]}{K_{D,a}(S_x)K_{D,b}(S_y)} \omega_{a:b}(x,y), \quad (2)$$

232 where  $a$  is an index that denotes protein type,  $[P_a]$  is the concentration of protein  $a$ ,  $S_x$  a probe subsequence of length  
 233  $L_a$  starting at an offset and strand denoted by  $x$ ,  $K_{D,a}(S_x)$  is the dissociation constant for protein  $a$  binding  $S_x$ , and  
 234  $\omega_{a:b}(x_1, x_2)$  quantifies the cooperativity between factors  $a$  and  $b$  binding at position  $x_1$  and  $x_2$ , respectively. Note that  
 235  $\omega_{a:b}(x_1, x_2)$  equals 1 if  $a$  and  $b$  bind independently from each other, equals 0 for prohibited conformations, and is  
 236 greater than 1 if the factors bind cooperatively.

It is convenient to express  $K_D$  in terms of its value for a references sequence  $S_0$  and a modifier factor called the relative binding affinity:

$$K_{D,a}^{\text{rel}}(S_x) = \frac{K_{D,a}(S_x)}{K_{D,a}(S_0)} = \exp\left(\frac{\Delta\Delta G_a(S_x)}{RT}\right). \quad (3)$$

237 Here  $\Delta\Delta G_m(S) \equiv \Delta G(S) - \Delta G(S_0)$  is the difference in free-energy penalty  $\Delta G$  of binding between  $S$  and  $S_0$ ,  $R$   
 238 denotes the ideal gas constant and  $T$  is the absolute temperature.

A central goal of our algorithm is to learn how  $\Delta\Delta G_m(S)$  depends on the sequence. ProBound models this as a sum of additive contributions associated with sequence features  $\phi$ :

$$\frac{\Delta\Delta G_a(S_x)}{RT} = \sum_{\phi \in \Phi} \beta_{a,\phi} X_{\phi}(S_x) \equiv \vec{\beta}_a \cdot \vec{X}(S_x) \quad (4)$$

239 Here  $\Phi$  is the set of sequence features,  $\beta_{\phi}$  is the energetic impact of  $\phi$ , and  $X_{\phi}(S_x)$  is a binary indicator of whether  
 240 sequence  $S_x$  contains  $\phi$ . By default,  $\Phi$  is simply the letter sequence along  $S_x$ , meaning  $\vec{\beta}$  encodes a position-specific  
 241 affinity matrix (PSAM) with size matching the length of  $S_x$ . ProBound can also include letter pairs (both adjacent  
 242 and non-adjacent) as features.

### 243 Implementation of binding model

While the above derivation provides a motivation for the binding model, it has to be adapted for SELEX experiments. First, it is clear from Eq. 2 that the protein concentration  $[P_a]$  and binding constant  $K_{D,a}(S_0)$  for a given factor  $a$  cannot be separately estimated from the data, but only the ratio  $\alpha_a = [P_a]/K_{D,a}(S_0)$  can, a quantity we call the binding mode activity. We similarly define the binding mode interaction activities as  $\alpha_{a:b} = [P_a][P_b]/K_{D,a}(S_0)K_{D,b}(S_0)$ . Second, because the free protein concentration can vary between SELEX rounds  $r$ , the activities can take independent values

in each round. Third, most experiments are performed in a low-protein-concentration regime where  $Z_{\text{bound}} \ll 1$  and  $P_{\text{bound}} \propto Z_{\text{bound}}$ . Because the data only provide information about the relative rate at which probes are selected, only the relative values of  $\alpha_a$  and  $\alpha_{a:b}$  are meaningful in this limit. Fourth, while PSAM models can be accurate for close-to-consensus sequences, they severely underestimate the affinity of far-from-consensus sequences, for which non-specific binding is dominant<sup>56</sup>. This can be addressed by including a non-specific binding term  $\alpha_{\text{N.S.}}$  in  $Z_{\text{bound}}$ . Finally, it is sometimes important to include a factor  $\omega_a(x)$  that models biases in binding along the probe. Putting all of this together gives that the partition function in selection round  $r$  is given by:

$$Z_{\text{bound},r} = \alpha_{\text{N.S.},r} + \sum_a \alpha_{a,r} \sum_x \omega_a(x) e^{-\beta_a X(\vec{S}_x)} + \sum_{a,b} \alpha_{a:b,r} \sum_{x,y} e^{-\beta_a X(\vec{S}_x) - \beta_b X(\vec{S}_y)} \omega_{a:b}(x,y) \quad (5)$$

244 The binding probes typically feature a variable region flanked by constant sequences. The sliding window sum over  
 245 subsequences  $S_a$  can be configured to include  $f_a$  letters from the flanking sequences. By default, the sum runs over  
 246 both strands, but it can be restricted to only one strand (which is useful for modeling RNA and peptides).

### 247 **Selection model**

The selection model predicts the relative concentrations  $f_{i,r}$  of each binding probe  $i$  each selection round  $r$ . By default, the concentrations in two subsequent rounds are related through an enrichment factor proportional to the binding. It is convenient to express this as

$$f_{i,r} = f_{i,r-1} (Z_{\text{bound},i,r})^\rho (1 + Z_{\text{bound},i,r})^\gamma \quad (6)$$

248 where  $Z_{\text{bound},i,r}$  is the partition function evaluated for probe  $i$  in round  $r$ . Experiments conducted in the low-protein-  
 249 concentration limit are modeled by setting  $(\rho, \gamma) = (1, 0)$ . Binding saturation can be accounted for by setting  
 250  $(\rho, \gamma) = (1, -1)$ .

Some experiments (such as  $K_D$ -seq, see below), do not use multiple rounds of binding enrichment and are better modeled using

$$f_{i,r} = f_{i,0} (Z_{\text{bound},i,r})^{\rho r} (1 + Z_{\text{bound},i,r})^{\gamma r} \quad (7)$$

Finally, kinetic experiments that enrich and sequence modified or unmodified probes can be modeled using the constant-rate enrichment model:

$$f_{i,r} = f_{i,r-1} \left( \frac{1}{1 + e^{-\delta}} e^{-Z_{\text{bound},i,r}} + \frac{1}{1 + e^{\delta}} (1 - e^{-Z_{\text{bound},i,r}}) \right) \quad (8)$$

251 Here  $\delta \rightarrow \infty$  and  $\delta \rightarrow -\infty$  correspond to the unmodified and modified fractions, respectively.

### 252 **Sequencing model**

The sequencing model computes the likelihood of the observed count tables  $k_{i,r}$  given the relative concentrations  $f_{i,r}$  predicted by the selection model. The counts are assumed to follow a Poisson distribution with expectation value

$$E[k_{i,r}] = \eta_r f_{i,r} \quad (9)$$

Here the parameter  $\eta_r$  normalizes the relative probe concentration and adjusts to the correct sequencing depth. The (rescaled) likelihood is then

$$\log \mathcal{L} = \sum_{r,i} [k_{i,r} \log(\eta_r f_{i,r}) - \eta_r f_{i,r}] / k_{\text{total}} + \text{const.} \quad (10)$$

where  $k_{\text{total}}$  is the total number of reads and where the last term is independent of model parameters and can be ignored for the purpose of optimization. Because  $f_{i,r}$  is proportional to  $f_{i,0}$ , the latter parameter can be optimized analytically and substituted back into Eq. 10, giving

$$\log \mathcal{L} = \sum_{r,i} (k_{i,r} \log p_{r,i}) / k_{\text{total}} + \text{const.} \quad (11)$$

253 where  $p_{r;i} = \eta_r f_{i,r} / \sum_{r'} \eta_{r'} f_{i,r'}$ . Note that Eq. 11 also can be derived by assuming the counts for each probe follow  
 254 the multinomial distribution across columns with probability  $p_{r;i}$ . Also note that because all unobserved probes  
 255 have  $k_{i,r} = 0$  and do not contribute to the likelihood, the sum over  $i$  only runs over the the observed probes. This  
 256 is a major advantage compared to NRLB<sup>22</sup>, where the sum is over all  $4^L$  probes, with  $L$  is the number of variable  
 257 positions. This sum can only be evaluated using dynamic programming and this restricts NRLB to data from only a  
 258 single round of affinity-based enrichment in the absence of saturation. Finally, note that Eq. 11 is independent of  
 259 the initial probe frequencies  $f_{i,0}$ , meaning that initial library need not be random but can consist of genomic DNA  
 260 fragment or custom-designed sequences.

### 261 **Multi-experiment learning**

ProBound simultaneously models multiple experiments by computing the likelihood  $\mathcal{L}_e$  of each experiment  $e$  and then optimizing the combined likelihood

$$\log \mathcal{L} = \sum_e \log \mathcal{L}_e \quad (12)$$

262 The precise way in which the likelihood  $\mathcal{L}_e$  is evaluated can be tailored to the details of each experimental design:

- 263 1. A different configuration of binding modes and their interactions can be chosen for each experiment when  
 264 computing  $Z_{\text{bound}}$  when desired.
- 265 2. The binding mode (and interaction) activities can either take independent values  $\alpha_{a,e}$  in each experiment or be  
 266 constrained to  $\alpha_{a,e} = [P_a]_e \alpha_a$  where  $\alpha_a$  is the global activity of binding mode  $a$  and  $[P_a]$  is a set parameter.  
 267 The latter is useful when integrating experiments conducted at different protein concentrations, or in kinetic  
 268 assays where  $[P_a]$  is set to the treatment time.
- 269 3. Chemical modifications are encoded by expanding the alphabet and transliterating letters appropriate experi-  
 270 ments. For example, meCpG modifications can be encoded using the alphabet ACCGGT, the complementarity  
 271 rules  $A \leftrightarrow T, C \leftrightarrow G, c \leftrightarrow g$ , expanding the feature set  $\Phi$  of the binding model to include the additional letters,  
 272 and performing the transliteration  $CG \rightarrow cg$  for methylated probes.

### 273 **Regularization**

Three regularization terms were included to avoid overfitting and to improve the stability of the numerical optimiza-  
 tion: The first was a  $L_2$  regularization term for the parameter vector

$$\vec{\theta} = \{\beta_\phi, \log \alpha_a, \log \alpha_{a:b}, \log \omega_a(x), \log \omega_{a:b}(x, y), \log \eta_r\} \quad (13)$$

with weight  $\lambda$ . The second term was inspired by the Dirichlet distribution which commonly is used as a prior  
 for probability parameters. For each feature  $\phi$  thus we identified all features  $\Phi^c(\phi)$  that are of the same class  $c$   
 (monomer, or dimer with the same spacing) and located at the same position within the binding site, and then define  
 a feature probability

$$p(\phi) = \frac{e^{\beta_\phi}}{\sum_{\phi' \in \Phi^c(\phi)} e^{\beta_{\phi'}}} \quad (14)$$

The regularization term is then computed as the rescaled log-PDF of  $p(\phi)$  in the Dirichlet distribution

$$\frac{k_{\text{Dirichlet}}}{k_{\text{total}}} \sum_{\phi} \log p(\phi) \quad (15)$$

where  $k_{\text{Dirichlet}}$  is analogous to a pseudocount. The final regularization term in the likelihood is defined as

$$\sum_i \left( e^{\theta_i - \theta_{\max}} + e^{-\theta_i - \theta_{\max}} \right) \quad (16)$$

274 and introduces an exponential barrier (by default  $\theta_{\max} = 40$ ) that prevents the optimizer from failing or getting  
 275 trapped in regions with large numerical errors.

## 276 **Procedure for setting $k_{\text{Dirichlet}}$**

277 The importance of the Dirichlet regularizer in Eq. 15 is set by  $k_{\text{Dirichlet}}$ . For fits with all-by-all interactions, the  
278 inferred coefficients tended to be unstable for small values of  $k_{\text{Dirichlet}}$ . While increasing  $k_{\text{Dirichlet}}$  stabilizes the  
279 coefficients, they shrink towards zero when  $k_{\text{Dirichlet}}$  is excessively large. We thus developed a procedure for setting  
280  $k_{\text{Dirichlet}}$  and applied it uniformly in our analysis of Dll (Figure 4b), RBFOX2 (Figure S5j), and Src (Figure 6b). In  
281 this procedure, we ran ProBound using a wide range of Dirichlet weights ( $k_{\text{Dirichlet}} \in \{0, 10, 20, 50, 100, 200, 500,$   
282  $1000, 2000\}$ ), fixed the monomer coefficients  $\vec{\beta}_{\text{mono}}$  and dimer coefficients  $\vec{\beta}_{\text{di}}$  in each resulting model using the  
283 mismatch gauge (see below), and computed the pairwise Pearson correlation  $r^2$  between the inferred  $\vec{\beta}_{\text{di}}$  for different  
284 values of  $k_{\text{Dirichlet}}$ . The resulting matrix  $r^2(k_1, k_2)$ , where  $k_1$  and  $k_2$  are values of  $k_{\text{Dirichlet}}$ , had a block-like structure  
285 where  $\vec{\beta}_{\text{di}}$  was highly correlated for large values of  $k_1$  and  $k_2$  but only weakly correlated when  $k_1$  or  $k_2$  was small. We  
286 considered the coefficients to have stabilized when  $r^2 > 0.8$  between a model and the model with the next-smaller  
287 value of  $k_{\text{Dirichlet}}$ . Using this procedure, we fixed  $k_{\text{Dirichlet}}$  to be 200 for RBFOX2, 200 for the single-experiment Dll  
288 analyses, 1000 for the multi-experiment Dll analyses, and 50 for Src.

## 289 **Model optimization scheme**

290 ProBound optimizes the above model by first restricting it to only include the first binding mode (and non-specific  
291 binding) and optimizing this model, and then sequentially including and optimizing additional binding modes (and  
292 interactions as they become possible). As each new binding mode  $a$  (or interaction  $a : b$ ) is included and optimized,  
293 the algorithm takes seven sub-steps: (i) heuristic adjustment of  $\alpha_a$  (or  $\alpha_{a:b}$ ) so that it is expected to contribute to  
294 5% to  $Z_{\text{bound}}$ ; (ii) freezing the values of all model parameters; (iii) unfreezing and optimizing  $\eta$  to avoid shocks  
295 from incorrectly predicted sequencing depth; (iv) unfreezing and optimizing the monomer features in  $\vec{\beta}_a$  mode  
296 to give an initial binding model ( $\omega_{a:b}(x, y)$  is unfrozen and optimized for interactions); (v) greedy exploration of  
297 alternative binding models with different frame shift (shifting the recognized sequence features to left or right),  
298 footprint (expanding the region of feature recognition to the left and/or right) or flank length (including subsequences  
299 located further into the fixed flanking regions when computing  $Z_{\text{bound}}$ ); (vi) sequential unfreezing and optimization  
300 of dimer features and  $\omega_a(x)$  if applicable; (vii) unfreezing of all model parameters. At each substep, L-BFGS is used  
301 to optimize the unfrozen parameters. By default, the parameters are seeded with small random numbers, but the  
302 binding modes can also optionally be seeded using IUPAC codes. Additional constraints can be imposed on the  
303 parameters to implement reverse-complement symmetric binding modes or translationally symmetric interactions.

## 304 **Gauge fixing**

Models with pairwise letter interactions are over-parametrized, meaning that an infinite set of parameter values  
 $\vec{\beta}$  encode the same sequence specificity. Specifically, for any binding site sequence  $S$ ,  $\vec{\beta} \cdot \vec{X}(S)$  is invariant under  
transformations of the form

$$\beta_\phi \rightarrow \beta_\phi + A \quad \forall \phi \in \Phi_{\text{mono}}(x_1) \quad (17)$$

$$\beta_\phi \rightarrow \beta_\phi - A \quad \forall \phi \in \Phi_{\text{di}}(x_1, x_2, n) \quad (18)$$

305 where  $\Phi_{\text{mono}}(x_1)$  is the set of monomer features at position  $x_1$ ,  $\Phi_{\text{di}}(x_1, x_2, n)$  is the set of dimer features connecting  
306 positions  $x_1$  and  $x_2$  and with  $n$  at  $x_2$ , and  $A$  is the transformation coordinate. For visualization and model comparison  
307 purposes, it is convenient to select one representative model for each sequence specificity (analogous to gauge fixing  
308 in physics). We here use a convention we call the 'mismatch gauge'. In this convention, the coefficients are such that,  
309 first, only one monomer coefficient contributes for single-edit variations of reference sequence  $S_0$ , and, second, at  
310 most one of the dimer coefficients contribute for each double-edit variations of  $S_0$ . After imposing mutation gauge,  
311 the resulting PSAMs were visualized using standard energy logos<sup>57</sup> and the interaction coefficients were displayed  
312 using heat maps.

## 313 **Benchmarking ProBound**

### 314 **How fits were trained, trimmed, and selected**

315 To benchmark ProBound, we first curated a training database of published TF SELEX datasets<sup>9, 10, 12, 14, 15, 26–28</sup>.  
316 Datasets with low sequencing depth or low enrichment were filtered out as described below. Each dataset was then

analyzed by ProBound using three settings that differed in the number of binding modes and in how non-specific binding was modeled (see Supplemental Methods).

For each resulting fit, one binding mode typically captured the TF sequence specificity and the other typically absorbed platform-specific biases. To automatically identify the TF mode, we computed a heuristic quality score, which favors modes that both are important for the fit and have high specificity, and selected the mode with the top score. This score was  $r_{\text{mode}}^2 + \log I_{\text{mono}}$ , where  $r_{\text{mode}}^2$  is the Pearson correlation (across SELEX probes) of the log-transformed binding affinity predicted by the mode (plus an optimized non-specific term) and the log-transformed binding predicted by the full fit, and  $I_{\text{mono}}$  is the information content of the mononucleotide coefficients after imposing the mismatch gauge.

To automatically select which of the three settings produced the best fit in a way that does not give an unfair advantage when comparing to published models, we developed the quality score  $S_{\text{training}}$  which measures model performance in predicting the training data.  $S_{\text{training}}$  was defined to be the average of six sub-scores that quantify different aspects of model performance:

$$S_{\text{training}} = \text{mean} \left( \{ F_{\text{logit}}(r_{\text{fit},8\text{mer}}^2; 0.5), F_{\text{logit}}(R_{\text{fit},\text{affinity}}^2, 0.95), F_{\text{log}}(f_{\text{fit},\text{affinity}}; 5.0), F_{\text{logit}}(R_{\text{scoring},\text{training}}^2; 0.95), F_{\text{log}}(\text{MAFR}_{\text{scoring},\text{training}}; 5.0), F_{\text{log}}(I_{\text{scoring},\text{mono}}; 3.0) \} \right) \quad (19)$$

where the functions  $F_{\text{logit}}(x; x_0) = \text{expit}(\text{logit}(x) - \text{logit}(x_0))$  and  $F_{\text{log}}(x; x_0) = \text{expit}(\log(x) - \log(x_0))$  map the metric  $x$  to the unit interval such that the threshold  $x_0$  maps to 0.5. Here,

- $r_{\text{fit},8\text{mer}}^2$  was computed by first using the full ProBound model to predict the training count table, then counting the number of occurrences  $n_{8\text{mer}}^{\text{obs/pred}}(k, r)$  of each 8mer  $k$  in each round  $r$  of the of the observed and predicted count tables, then computing the observed and predicted 8mer enrichment between the first and last round using

$$f_{8\text{mer}}^{\text{obs/pred}}(k) = \frac{1}{r_{\text{last}} - r_{\text{first}}} \log \left( \frac{1 + n_{8\text{mer}}^{\text{obs/pred}}(k, r_{\text{last}})}{1 + n_{8\text{mer}}^{\text{obs/pred}}(k, r_{\text{first}})} \right) \quad (20)$$

and finally computing the Pearson correlation between  $f_{8\text{mer}}^{\text{obs}}$  and  $f_{8\text{mer}}^{\text{pred}}$ .

- $R_{\text{fit},\text{affinity}}^2$  and  $f_{\text{fit},\text{affinity}}$  were computed by first using the full ProBound model to predict the training count table. Then, for each pair of rounds subsequent rounds  $r$  and  $\text{next}(r)$  (ignoring rounds with less than 10,000 reads), the probes were sorted (conjointly in the observed and predicted tables) by the predicted enrichment between the rounds. The probes were then divided into bins  $i$  with associated the observed and predicted probe counts  $n_{\text{bin}}^{\text{obs/pred}}(i, r)$  such that  $n_{\text{bin}}^{\text{obs}}(r) + n_{\text{bin}}^{\text{obs}}(\text{next}(r)) = 1000$  in each bin. After computing the observed and predicted enrichment using

$$f_{\text{bin}}^{\text{obs/pred}}(i; r) = \frac{1}{\text{next}(r) - r} \log \left( \frac{1 + n_{\text{bin}}^{\text{obs/pred}}(i, \text{next}(r))}{1 + n_{\text{bin}}^{\text{obs/pred}}(i, r)} \right) \quad (21)$$

we finally computed the metrics

$$R_{\text{fit},\text{affinity}}^2 = \max_r R_k^2 \left( f_{\text{bin}}^{\text{obs}}(i; r), f_{\text{bin}}^{\text{pred}}(i; r) \right) \quad (22)$$

$$f_{\text{fit},\text{affinity}} = \max_r \left( \frac{\max_i f_{\text{bin}}^{\text{obs}}(i; r)}{\min_i f_{\text{bin}}^{\text{obs}}(i; r)} \right) \quad (23)$$

where  $R_k^2$  denotes the coefficient of variation evaluated across bins  $i$ .

- $R_{\text{scoring},\text{training}}^2$  and  $\text{MAFR}_{\text{scoring},\text{training}}$  were computed using the same method that was used to quantify generalization performance in predicting testing SELEX data (see below) but instead predicting the training data.
- $I_{\text{scoring},\text{mono}}$  is the information content of the scoring model, computed using the monomer coefficients after imposing the mismatch gauge.

### 335 **Evaluation of Model Performance**

336 To benchmark the resulting binding models, we curated a testing database of published SELEX (same as training  
337 database, but excluding the training dataset), PBM<sup>58–60</sup> and ENCODE ChIP-seq<sup>31</sup> datasets. We then quantified the  
338 ability of the above binding models to predict the testing data. Binding models and testing data were matched by TF  
339 and species; if no match was found, the matching criteria were expanded to consider orthologous human and mouse  
340 TFs. For comparison, we also downloaded binding models from the JASPAR, DeepBind, HOCOMOCO databases  
341 and the original HT-SELEX TF binding survey<sup>26,30,32,33</sup> and repeated all analysis using these models.

For the SELEX and PBM experiments, we used the binding models to predict the total affinity (denoted  $x_i$ ) for each probe  $i$  and quantified how well these predictions agree with the measured binding  $y_i$ . For the SELEX experiments, the signal consisted of the probe-count enrichment  $k_{i,r+1}/k_{i,r}$  between subsequent SELEX rounds (with maximum normalized to 1). For the PBM experiments, the background-subtracted and min-max normalized binding signal was used. For both platforms we encountered two challenges: First, the measurements for individual probes were too noisy to quantify model performance accuracy (for SELEX, typical sequences were observed just once; for PBM, the signal depends strongly on the position of the binding site in the probe, which varies). Inspired by earlier PBM analyses which removed position bias by considering the 8mer-binned median signal<sup>29,61</sup>, we sorted and binned the probes using  $x_i$  (with bin size 500 for SELEX and 10 for PBM) and then computed the binned signal  $y_i$  (using the bin-averaged enrichment, with pseudocount 1, for SELEX, and the median signal for PBM). Second, binding signals can be distorted by experimental artifacts such as binding saturation, background, and non-specific binding not modeled by the model. To correct for such distortions,  $x_i$  was transformed using the binding saturation function:

$$\hat{y}_i = \frac{\beta_0}{1 + (\beta_C(x_i + \beta_{\text{NSB}}))^{-1}} \quad (24)$$

342 Here  $\beta_0$  sets the scale,  $\beta_C > 0$  sets the concentration, and  $\beta_{\text{NSB}}$  sets the non-specific binding. These parameters  
343 were estimated by minimizing  $\sum_i [\log(y_i/\hat{y}_i)]^2$  for SELEX (with  $\beta_0 > 0$  and  $\beta_{\text{NSB}} > 0$ ) and  $\sum_i (y_i - \hat{y}_i)^2$  for PBM (for  
344 which  $y_i$  can be negative). Model quality was then quantified using the coefficient of determination  $R^2$  of  $y_i$  and  
345  $\hat{y}_i$  (on a logarithmic scale for SELEX) and the MAFR, which is defined as  $(\max_i y_i)/y_{\text{bg}}$  where  $y_{\text{bg}}$  is the weakest  
346 signal detected by the model. To estimate  $y_{\text{bg}}$ , we first defined a set of (binned) probes predicted to be bound as  
347  $\hat{y}_i > 1.25 Q_1(\hat{y})$  (where  $Q_1$  is the first quartile) and then defined  $y_{\text{bg}}$  to be the smallest value of  $y_i$  identifying the  
348 bound set at 5% FDR. For multi-round SELEX experiments,  $R^2$  and the effective range were computed for all rounds  
349 and the largest values were recorded.

350 For the ChIP-seq experiments, we quantified model performance using the area under the precision-recall curve  
351 in classifying binding peak vs. background sequences. To get the peak sequences, we downloaded `narrowPeak`  
352 files from the ENCODE portal (see below) and extracted the genome sequence from the 500 peaks with the strongest  
353 enrichment. To generate the background set, we shifted the peak interval one peak length to the left and right and  
354 extracted the genome sequences.

### 355 **Filtering of SELEX training datasets**

We first curated a database of published SELEX experiments and downloaded the associated raw sequencing data<sup>9,10,12,14,15,26–28</sup>. Methylated SELEX experiments were not considered. For each experiment, we downsampled the sequencing libraries to contain at most 100,000 reads and tabulated the probe counts in each SELEX round. We then filtered out low-quality experiments using three criteria: First, low-coverage experiments were removed by requiring at least two rounds to have at least 10,000 reads. Second, experiments were discarded if no sequencing library before round three had 10,000 or more reads. Third, experiments with low-enrichment were discarded. The enrichment was quantified by first tabulating the frequencies  $p(k, r)$  (using pseudocount 5) of all 5mers  $k$  in each SELEX round  $r$ , and then, for each pair of rounds  $r_i$  and  $r_j$  with 10,000 or more reads, computing the rescaled KL divergence

$$D_{\text{KL}}(r_2, r_1) = \frac{\sum_k p(k, r_2) \log_2 \frac{p(k, r_2)}{p(k, r_1)}}{r_2 - r_1} \quad (25)$$

356 Only experiments with rescaled KL divergence exceeding 0.01 for at least one combination of rounds were retained.

### 357 **Scoring of binding probes**

358 In quantifying generalization performance, we predicted the occupancy of DNA sequences using both the ProBound  
359 binding models and previously published models. For DeepBind, we exponentiated the scores returned from the  
360 deepbind scoring tool, which is proportional to binding affinity. For JASPAR and original HT-SELEX TF survey,  
361 the binding models were position-frequency matrices (containing counts). These were first converted to position  
362 probability matrices (PPM, using a pseudocount of 1) which were then used to compute the binding probability  
363 at each offset in the sequence. The occupancy was then defined to be the sum of the binding probabilities. For  
364 HOCOMOCO, the binding models were PPMs and the occupancies were computed as described above.

### 365 **ENCODE ChIP-seq datasets**

366 ENCODE datasets were downloaded on December 2018 using the query string:

```
367 https://www.encodeproject.org/metadata/type=Experiment&status=released& ...  
368 ... perturbed=false&assay_title=TF+ChIP-seq&target.investigated_as= ...  
369 ... transcription+factor&audit.ERROR.category%21=extremely+low+read+ ...  
370 ... length&audit.ERROR.category%21=control+extremely+low+read+depth& ...  
371 ... audit.ERROR.category%21=extremely+low+read+depth& ...  
372 ... audit.NOT_COMPLIANT.category%21=insufficient+replicate+concordance& ...  
373 ... audit.NOT_COMPLIANT.category%21=unreplicated+experiment& ...  
374 ... audit.NOT_COMPLIANT.category%21=control+insufficient+read+depth& ...  
375 ... audit.NOT_COMPLIANT.category%21=poor+library+complexity& ...  
376 ... audit.NOT_COMPLIANT.category%21=severe+bottlenecking&...  
377 ... audit.NOT_COMPLIANT.category%21=insufficient+read+length&...  
378 ... audit.NOT_COMPLIANT.category%21=insufficient+read+depth& ...  
379 ... files.file_type=bed+narrowPeak/metadata.tsv
```

### 380 **Binding by multi-protein complexes**

#### 381 **ProBound Analysis**

382 ProBound was configured to jointly analyze SELEX experiments performed with different combinations of TFs,  
383 as described in the Supplemental Methods. In the case of Hth-Exd-Ubx, we analyzed published SELEX-seq  
384 experiments for Exd-Ubx, Hth, Exd, and Ubx. In addition, we performed SELEX-seq for Hth-Exd-Ubx (see below).  
385 POU2F-GSC2 and ELK1-GCM1 were analyzed as described in the Supplemental Methods and Supplemental Table  
386 4.

#### 387 **Experimental Protocol**

388 The Hth-Exd-Ubx SELEX experiment was carried out following previously published methods<sup>10,62</sup>. Briefly, after  
389 expressing and purifying the wild-type homeodomain proteins, a final concentration of 50 nM was assembled,  
390 incubated with excess DNA (10-20 fold) for 30 minutes, and loaded onto an EMSA gel. A DNA library with 30  
391 randomized bases was used. The TF-bound fraction was isolated from the gel, amplified, and either subjected  
392 to another round of enrichment or prepared for sequencing. Three rounds of enrichment were performed. After  
393 each selection round, the DNA was extracted from the gel and amplified by using Illumina's small RNA primer  
394 sets. Sequencing barcodes were added in a five cycle PCR step and the final library was gel-purified using a native  
395 TBE-gel before sequencing. Libraries were sequenced at the New York Genome Center using separate lanes on an  
396 Illumina HiSeq 2000 sequencing machine.

### 397 **Effect of DNA Methylation**

#### 398 **ProBound Analysis**

399 ProBound learns methylation-aware binding models by jointly analyzing normal and methylated SELEX libraries  
400 after encoding the methylation state of each basepair using an extended alphabet (see Figure S3a and configuration



401 in Supplemental Methods). Encoding methylation status in this manner allows us to infer the position-specific  
402 free energy impact of such chemical modifications. For the ATF4/CEBP $\gamma$  homo- and hetero-dimers, we jointly  
403 analyzed two published EpiSELEX-seq experiments for ATF4 and CEBP $\gamma$ , and a new EpiSELEX-seq experiment  
404 that included both ATF4 and CEBP $\gamma$ . We also generated EpiSELEX-seq data for CEBP $\gamma$  in combination with the  
405 chemical modifications meCpG, 5hmC, and 6mA.

### 406 **Experimental Protocol**

407 ATF4 protein purification and EpiSELEX-seq experiments were performed as described previously<sup>15</sup>. Purified  
408 CEBP $\gamma$  protein was kindly donated by the Lomvardas lab at the Zuckerman Institute at Columbia University.  
409 To generate randomized 5hmC or 6mA libraries, single-stranded oligos with a 16-bp randomized region were  
410 ordered from TriLink Biotechnologies, substituting i) deoxycytidine triphosphate (dCTP) with deoxy-(5hm)-cytidine  
411 triphosphate (d5hmCTP), or ii) deoxyadenosine triphosphate (dATP) with deoxy-(6m)-adenosine triphosphate  
412 (d6ATP) during the synthesis step. For double-stranding, a standard mix of deoxy-nucleotides was used, resulting  
413 in hemi-modified libraries. meCpG libraries were generated by enzymatic treatment with M.SssI (NEB) as  
414 described previously<sup>15</sup>. The library sequences consisted of left and right constant adapters (GGTAGTGGAGG- and  
415 -CCAGGGAGGTGGAGTAGG respectively) flanking a library specific barcode and a 16bp randomized sequence:

- 416 • no modification: -TGGG-CCTGG-N16-
- 417 • meCpG: -GCAC-CCTGG-N16-
- 418 • 5hmC-Library: -CAGT-CCTGG-N16- (5hmC instead of C in 16N)
- 419 • 6mA-Library: -AGTG-CCTGG-N16- (6mA instead of A in 16N)

### 420 **GLM analysis of ATF4 and CEBP $\gamma$ ChIP data**

421 To estimate the effect of DNA methylation on *in vivo* ATF4 and CEBP $\gamma$  binding, we first scanned the genome for  
422 close-to-consensus motif matches  $i$  with CG at positions predicted by the model to have strong methylation readout:  
423 TGACGTCA and TGACGTCG for ATF4:ATF4; TTGCGCAA for CEBP $\gamma$ :CEBP $\gamma$ ; and TTGCGTCA and TTGCATCG  
424 for CEBP $\gamma$ :ATF4. We next downloaded aligned ATF4 and CEBP $\gamma$  ChIP-seq reads and matched input from ENCODE  
425 (ENCF872NFM, ENCF801LQC, ENCF713PVH), extended the alignments to 125bps, and computed the genome  
426 coverages ( $k_{ATF4,i}$ ,  $k_{CEBP\gamma,i}$ ,  $k_{Input,i}$ ) at each motif match. The DNase-seq coverage ( $k_{DNase,i}$ , ENCF971AHO) and  
427 bisulfite sequencing methylation status ( $f_{meCpG,i}$ , ENCSR765JPC, binarized using 20% and 80% thresholds, and  
428 keeping matches with at least 10 reads) were also recorded. We finally modeled the ATF4 and CEBP $\gamma$  ChIP-seq  
429 coverage at the relevant motif matches (excluding CEBP $\gamma$ :CEBP $\gamma$  matches for ATF4 and ATF4:ATF4 matches for  
430 CEBP $\gamma$ ) using two separate binomial generalized linear models:

$$k_{ChIP,i} \sim \text{Binomial} \left( k_{ChIP,i} + k_{Input,i}, \frac{e^{\eta_i}}{1 + e^{\eta_i}} \right) \quad (26)$$

$$\eta_i = \beta_{0,a} + k_{DNase,i} \beta_{DNase} + f_{meCpG,i} \beta_{meCpG,a} \quad (27)$$

431 In this model,  $\beta_{0,a}$  encodes the relative affinity of motif  $a$ ,  $\beta_{DNase}$  encodes the impact of DNA accessibility, and  
432  $\beta_{meCpG}$  encodes the impact of DNA methylation for motif  $a$  and is the sought-after variable. The significance of the  
433 methylation readout was assessed using a F-test (see Supplemental Table 2). For TGACGTCG, we assumed that the  
434 methylation readout of the two CGs contribute independently and that the readout of the central CG can be estimated  
435 using the sequence TGACGTCA.

### 436 **Inferring Absolute $K_D$ 's**

The  $K_D$ -seq assay incubates a protein TF (or other protein) with a library of DNA probes (or RNA or peptide probes),  
separates the bound and free probes, and sequences the input (I), bound (B) and free (F) fractions. In equilibrium,

the probability that probe  $i$  is bound or free is given by

$$p(B|i) = \frac{[\text{DNA}_i]_B}{[\text{DNA}_i]_I} = \frac{[P]_F}{[P]_F + K_{D,i}} \quad (28)$$

$$p(F|i) = \frac{[\text{DNA}_i]_F}{[\text{DNA}_i]_I} = \frac{K_{D,i}}{[P]_F + K_{D,i}} \quad (29)$$

where  $[\text{DNA}_i]_I$ ,  $[\text{DNA}_i]_B$ , and  $[\text{DNA}_i]_F$  are the probe concentrations in the input, free and bound libraries,  $[P]_F$  is the free protein concentration, and  $K_{D,i}$  is the dissociation constant that we wish to measure. The sequencer does not measure  $p(B|i)$  or  $p(F|i)$  directly but rather gives the probe counts  $k_{i,I}$ ,  $k_{i,B}$ , and  $k_{i,F}$ . The expectation values of these counts are given by

$$\begin{aligned} \frac{E[k_{i,I}]}{k_I} &= \frac{[\text{DNA}_i]_I}{[\text{DNA}]_I} = p(i) \\ \frac{E[k_{i,B}]}{k_B} &= \frac{[\text{DNA}_i]_B}{[\text{DNA}]_B} = p(i|B) \\ \frac{E[k_{i,F}]}{k_F} &= \frac{[\text{DNA}_i]_F}{[\text{DNA}]_F} = p(i|F) \end{aligned} \quad (30)$$

where  $[\text{DNA}]_I$ ,  $[\text{DNA}]_B$ ,  $[\text{DNA}]_F$  are the DNA concentrations in the in the respective fractions,  $k_I$ ,  $k_B$  and  $k_F$  are the sequencing depths of the libraries which are treated as fixed experimental setting. To estimate the dissociation constants, note that

$$\frac{K_{D,i}}{[P]_F} = \frac{p(F|i)}{p(B|i)} = \frac{p(i|F)p(F)}{p(i|B)p(B)} \quad (31)$$

where  $p(B)$  and  $p(F)$  are the net fractions of DNA that is bound and free. Intuitively, these can fractions can be estimated from the data by finding the values that make the observed probabilities in Eq. 30 satisfy the sum rule:

$$p(i) = p(i,F) + p(i,B) = p(i|F)p(F) + p(i|B)p(B) \quad (32)$$

ProBound can be configured to learn a  $K_D$  model by analyzing the probe frequencies in the input, bound and free libraries ( $r = \{I, B, F\}$ ). Specifically, configuring ProBound to use the non-cumulative enrichment model (Eq. 7) with  $\rho_r = \{0, 1, 0\}$  and  $\gamma_r = \{0, -1, -1\}$  and restricting the activities to be constant across columns implements the binding probabilities in Eq. 29. With these settings,

$$K_{D,i} = [P]_F / Z_{\text{bound},i} \quad (33)$$

The ProBound model implicitly encodes  $p(B)$ ; this value can be found by equating the expected counts in ProBound

$$E[k_{i,I}] = \eta_I f_{i,I} \quad (34)$$

$$E[k_{i,B}] = \eta_B f_{i,I} p(B|i) \quad (35)$$

$$E[k_{i,F}] = \eta_F f_{i,I} p(F|i) \quad (36)$$

with the corresponding expectation values in Eq. 30, computing the bound-to-input ratio, and using Bayes' theorem to simplify, giving

$$p(B) = \frac{k_B \eta_I}{k_I \eta_B} \quad (37)$$

Test the modeling assumptions (c.f. Figure 4c), the probes were binned by the predicted  $K_{D,i}$ , and, for each bin, the observed and predicted binding probabilities were computed using

$$p(B|i) = \frac{E[k_{i,B}]}{E[k_{i,I}]} \frac{\eta_I}{\eta_B} \quad (38)$$

437 Here  $E[k_{i,B}]$  and  $E[k_{i,I}]$  were evaluated using the observed and predicted read counts in each bin.

## 438 **Experimental Protocol**

439 6xHis tagged *Drosophila* Distalless (Dll) protein lacking amino acids N terminal to its homeodomain (Dll $\Delta$ N) was pu-  
440 rified by standard procedures. 0.05% Tween-20 was included in the lysis buffer and in the elution buffer to prevent the  
441 target protein from sticking to plasticware. The purified protein was quantified by Bradford assay, using BSA as the  
442 standard. The 10mer R0 library was generated by annealing the library oligo (GTTTCAGAGTTCTACAGTCCGACCTGG  
443 -10N -CCAGGACTCGGACCTGGACTAGG) and the SELEX-R primer (CCTAGTCCAGGTCCGAGT), followed by a  
444 Klenow mediated primer extension reaction. The library DNA was purified using Qiagen minElute columns, and  
445 were quantified using nanodrop. The SELEX procedure was largely the same as previously described<sup>10</sup>, except that  
446 a Cy5 labeled DNA probe, instead of a P32 labeled probe, was used as the marker to indicate where the bound and  
447 unbound fractions were. The Cy5 labeled DNA probe was generated by annealing a Cy5 labeled primer to a DNA  
448 probe with the desired DNA sequence, followed by Klenow reaction. EDTA was used to stop the reaction. The  
449 probe was directly used in the binding reaction, without further purification.

450 For each SELEX condition, 15 $\mu$ l of protein solution (at 2x final concentration) in dialysis buffer (20mM HEPES  
451 pH8.0, 200mM NaCl, 10% glycerol, 2mM MgCl<sub>2</sub>, 0.05% Tween-20) was made. The library mixture was made by  
452 adding desired amount of the R0 library to 6 $\mu$ l of 5x binding buffer (50mM Tris-HCl pH7.5, 250mM NaCl, 5mM  
453 MgCl<sub>2</sub>, 20% glycerol, 2.5mM DTT, 2.5mM EDTA, 125ng/ $\mu$ l polydIdC, 100ng/ $\mu$ l BSA, 0.125% Tween-20), and  
454 filling to 15 $\mu$ l with H<sub>2</sub>O. The protein and DNA parts were mixed and incubated at room temperature for 30 to 40  
455 minutes before loading the gel. For Cy5 labeled markers, 15 $\mu$ l of 200nM Dll $\Delta$ N in dialysis buffer was mixed to 15 $\mu$ l  
456 of DNA mixture (6 $\mu$ l 5x binding buffer, 8 $\mu$ l H<sub>2</sub>O and 1 $\mu$ l 200nM probe), and was incubated at room temperature  
457 for 30 to 40 minutes.

458 After running the gel, gel slices corresponding to the bound and unbound fractions were cut from the gel, and  
459 were each place in a 500 $\mu$ l tube with several needle poked holes at the bottom. The 500 $\mu$ l tubes were each placed  
460 within a 2ml tube, and was spun at max speed at room temperature to smash the gel. 650 $\mu$ l of DNA extraction buffer  
461 (10mM Tris-HCl, pH7.5, 150mM NaCl, 1mM MgCl<sub>2</sub>, 0.5mM EDTA, pH 8.0), and 50 $\mu$ l of 20% SDS were added to  
462 each smashed gel sample, and the tubes were rotated at room temperature for 2 to 4 hours. The tubes were then spun  
463 at max speed at room temperature for 2 minutes. 650 $\mu$ l of sample was transferred to a Spin-X filter column, and  
464 was spun at room temperature at the max speed for 2 minutes. The DNA in flow through was purified by phenol  
465 chloroform extraction followed by isopropanol precipitation. 20 $\mu$ g of glycogen was used to facilitate precipitation,  
466 and the DNA pellet was dissolved in 20 $\mu$ l of Qiagen EB buffer.

467 Each purified SELEX DNA was properly diluted such that the following PCR program gave good library  
468 yield for all samples. The 1-step library preparation was done in a 50 $\mu$ l reaction, which contains 5 $\mu$ l of prop-  
469 erly diluted SELEX DNA, 10nM of one of the 8 SELEX-for primers, 10nM of the common SELEX-rev primer,  
470 1 $\mu$ M of NEB universal primer for Illumina, and 1 $\mu$ M of selected NEB index primer for Illumina. PCR was  
471 done with the Phusion DNA polymerase (NEB), using the following program: 1 cycle of 98°C for 30 seconds;  
472 5 cycles of 98°C for 10 seconds, 60°C for 30 seconds, and 72°C for 15 seconds; 10 cycles of 98°C for 10  
473 seconds, and 65°C for 75 seconds; 1 cycle of 65°C for 5 minutes; and hold at 4°C. Amplified libraries were  
474 purified using 1.5 volume (75 $\mu$ l) of Ampure beads, and eluted with 15 $\mu$ l of Qiagen EB buffer. The libraries  
475 were pooled and sequenced using Illumina Nextseq 550, following standard procedures. The forward primers  
476 consisted of consisted of left and right constant sequences (ACACTCTTCCCTACACGACGCTCTTCCGATCT-  
477 and -GTTTCAGAGTTCTACAGTCCGA repectively), flanking a library specific barcode: 1) --, 2) -AGAC-, 3)  
478 -TCAGAC-, 4) -CAGAC-, 5) -C-, 6) -GAC-, 7) -AC-, and 8) -TTCAGAC-. In addition we used the reverse  
479 primer GACTGGAGTTCAGACGTGTGCTCTTCCGATCT- CCTAGTCCAGGTCCGAGT, the NEB universal primer  
480 AATGATACGGCGACCACCGAGATCTACACTCTTCCCTA- CACGACGCTCTTCCGATCT, the NEB index primer  
481 CAAGCAGAAGACGGCATAACGAGAT-[6bp index]- GTGACTGGAGTTCAGACGTGTGCTCTTCCGATCT.

## 482 **EMSA validation**

483 The same batch of the Dll $\Delta$ N protein that was used in the SELEX experiments was also used in the measurement of  
484 the absolute  $K_D$  values of Dll $\Delta$ N to selected DNA sequences. The EMSA experiments were performed following  
485 regular protocol. Briefly, the protein was diluted with dialysis buffer to 2x of the desired final concentration in a total

486 volume of 15  $\mu$ l. The DNA mixture was made by mixing 6  $\mu$ l of 5x binding buffer, 8  $\mu$ l of H<sub>2</sub>O, and 1  $\mu$ l of 200nM  
 487 Cy5-labeled DNA probe. The DNA probes had the same flanks as the 10mer SELEX library, and the indicated  
 488 middle 10bp. The protein part and the DNA part were mixed well, and incubated at room temperature for 30 to 40  
 489 minutes before loading the 0.5X native TBE gel.

490 After running the gel, an image was taken using the Typhoon imager, and the band intensity was quantified using  
 491 FIJI v1.52n (see Supplemental Table 5). Briefly, each band was selected using the rectangle selection tool, and the  
 492 selected regions were converted to histograms. A straight line was drawn at the bottom of each histogram, and the  
 493 areas of the enclosed peak regions were quantified and used as band intensity.

$K_D$  was finally estimated used non-linear binding curve fitting. The intensity of the bound band decreased with migration distance (data not shown). We therefore estimated the fraction of bound probes as  $y_{\text{Bound}}/(y_{\text{Bound}} + \alpha y_{\text{Free}})$ , where  $y_{\text{Bound}}$  and  $y_{\text{Free}}$ , respectively, are the intensities of the bound and free band, and  $\alpha$  corrects for the migration-induced signal loss. In equilibrium, the predicted bound fraction equals

$$\left( 1 + \frac{2K_D}{[\text{TF}]_{\text{tot}} - [\text{DNA}]_{\text{tot}} - K_D + \sqrt{([\text{TF}]_{\text{tot}} - [\text{DNA}]_{\text{tot}} - K_D)^2 + 4K_D[\text{TF}]_{\text{tot}}}} \right)^{-1} \quad (39)$$

494 where  $[\text{TF}]_{\text{tot}}$  and  $[\text{DNA}]_{\text{tot}}$  are the total TF and DNA concentrations, respectively. For each probe,  $K_D$  and  $\alpha$  were  
 495 estimated by minimizing the squared difference between the estimated and predicted bound fractions across all  
 496 DIIAN concentrations.

### 497 **Peak-free motif discovery from ChIP-seq data**

498 To analyze the GR ChIP-seq data from the IMR90 cell line<sup>47</sup>, we first aligned the (single-end) Input and ChIP reads  
 499 to the genome and extracted a sufficiently long (200bp) sequence downstream of the 5'-end genomic position of the  
 500 mapped read. Next, we randomly sampled 10<sup>6</sup> reads from each library and constructed a count table containing the  
 501 Input and ChIP read counts in the first and second columns, respectively. ProBound was then configured to model  
 502 this table as a single-round SELEX experiment. Because GR binds DNA as a homodimer, we configured ProBound  
 503 to impose reverse-complement symmetry while fitting free-energy parameters the primary motif. We then iteratively  
 504 added three additional binding modes to the model to capture the influence of potential co-factors. To analyze the  
 505 GR ChIP-seq data from the murine hippocampus<sup>48</sup>, we followed a similar procedure and constructed one count  
 506 table for each of the three CORT concentrations (sampling 10<sup>5</sup> sequences per library) and then configured ProBound  
 507 to jointly model all count tables using a single reverse-complement-symmetric binding mode.

### 508 **Tyrosine kinase sequence recognition**

#### 509 **ProBound Analysis**

In this assay, a library of peptide substrates  $S_i$  is treated with a enzyme  $E$  and the concentrations of the products  $P_i$  is quantified using high-throughput sequencing (see below). This reaction can be modeled using Michaelis–Menten kinetics generalized to multiple substrates:

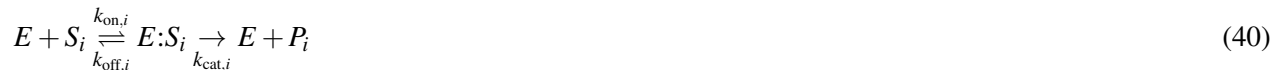

In the limit of low enzyme concentration, the reaction quickly reaches a quasi-steady state with

$$[E:S_i] = [E][S_i]/K_{M,i} \quad (41)$$

where  $K_{M,i} = (k_{\text{off}} + k_{\text{cat},i})/k_{\text{on},i}$  is the Michaelis constant for substrate  $i$ . In this limit, the change in substrate concentration is given by

$$\partial_t [S_i] = -k_{\text{eff},i} [S_i] [E] \quad (42)$$

where  $k_{\text{eff},i} = k_{\text{cat},i}/K_{M,i}$  is the catalytic efficiency. Integrating this equation yields

$$[S_i](t) = [S_i](0) e^{-k_{\text{eff},i} \int_0^t [E](t) dt} \quad (43)$$

where  $[S_i](0)$  is the substrate concentration right after the quasi-equilibrium was reached. The concentrations in the product library can then be expressed as

$$[P_i](t) = [S_i]_{\text{total}} \left( 1 - \frac{1 + [E](t)/K_{M,i}}{1 + [E](0)/K_{M,i}} e^{-k_{\text{eff},i}\bar{E}(t)t} \right) \quad (44)$$

where  $[S_i]_{\text{total}} = [S_i] + [E:S_i] + [P_i]$  is concentration in the initial library and  $\bar{E}(t) = t^{-1} \int_0^t [E](t) dt$  is the time-averaged enzyme concentration. This can be simplified further by noting that only a small fraction of substrates are bound in the limit of low enzyme concentration

$$[E:S_i]/[S_i] = [E]/K_{M,i} \ll 1 \quad (45)$$

and thus

$$[P_i](t) = [S_i]_{\text{total}} \left( 1 - e^{-k_{\text{eff},i}\bar{E}(t)t} \right) \quad (46)$$

Note that the selection only differs between probes through  $k_{\text{eff},i}$ . ProBound can thus model the assay using Eq. 8 with  $\delta \rightarrow -\infty$  and

$$Z_{\text{bound},i,P} = k_{\text{eff},i}\bar{E}(t)t \quad (47)$$

510 Here  $\bar{E}(t)$  depends on both  $K_{D,i}$  and  $[S_i]$  throughout the reaction and is generally unknown. We here assume that  
511 most enzyme is free so that  $\bar{E}(t) = [E]_{\text{total}}$ ; a lower (free) enzyme concentration would lead to a global rescaling of  
512  $k_{\text{eff},i}$  but not affect the relative efficiency or its sequence dependence.

### 513 **Preparation of degenerate peptide library to profile tyrosine kinase specificity**

514 The degenerate peptide library contained 11-residue sequences with five randomized amino acids flanking either  
515 side of a fixed central tyrosine residue. These sequences were fused to the eCPX bacterial surface display scaffold<sup>63</sup>.  
516 To clone this library, we first amplified the eCPX-coding sequence with a 3' SfiI restriction site. This was fused to  
517 the random library in another PCR step using the following degenerate oligonucleotide: GCTGGCCAGTCTGGCCAG-  
518 NNSNNSNNSNNSNNS<sub>t</sub>atNNSNNSNNSNNSNNS- GGAGGGCAGTCTGGGCAGTCTG, which contains a 5' SfiI site.  
519 The resulting amplified product was digested with SfiI restriction endonuclease, purified, and ligated into the SfiI-  
520 digested pBAD33-eCPX plasmid, as described previously<sup>53</sup>. The ligation reaction was concentrated and desalted,  
521 then used to transform DH5 $\alpha$  cells by electroporation. Transformed cells were grown overnight in liquid culture,  
522 then the plasmid DNA library was extracted and purified using a commercial midiprep kit.

### 523 **Preparation of biotinylated antibody**

524 The phosphotyrosine monoclonal antibody, pY20, conjugated to the fluorophore, perCP-eFluor 710 (Invitrogen,  
525 catalog 46-5001-42), was desthiobiotinylated before use in the specificity screen. The antibody was first purified  
526 away from bovine serum albumin (BSA) and gelatin by anion exchange using a salt gradient of 0 to 1 M NaCl in 0.1  
527 M potassium phosphate buffer. The fractions that eluted after 0.2 M NaCl were pooled and then buffer-exchanged  
528 into 0.1 M potassium phosphate by dilution and centrifugal filtration. The antibody was then labeled in a 200  $\mu$ L  
529 small-scale reaction using the DSB-X labeling kit (Molecular Probes) according to the manufacturer's instructions.  
530 Concentration of the antibody was monitored by its absorbance at 490 nm to determine percentage yield. The  
531 average final concentration of the antibody was around 0.2 mg/mL. The specificity of the antibody was validated  
532 using cells expressing displayed peptides. Cells treated with a tyrosine kinase without ATP show no background  
533 antibody staining. By contrast, cells expressing displayed peptides, treated with tyrosine kinase and 1mM ATP show  
534 increasing antibody staining as a function of phosphorylation time.

### 535 **High-throughput specificity screen**

536 The catalytic domain of the human tyrosine kinase c-Src was screened against the degenerate peptide library as  
537 described previously<sup>53</sup>, one main difference being the use of magnetic beads to isolate phosphorylated cells rather  
538 than fluorescence-activated cell sorting. In short, *E. coli* MC1061 cells transformed with the library were grown to  
539 an optical density of 0.5 at 600 nm. Expression of the surface-displayed peptides was induced with 0.4% arabinose  
540 for 4 hours at 25 °C. After expression, the cell pellets were collected and subject to a wash in phosphate buffered  
541 saline (PBS). Phosphorylation reactions of the library were conducted with 500 nM of purified c-Src and 1 mM  
542 ATP in a buffer containing 50 mM Tris, pH 7.5, 150 mM NaCl, 5 mM MgCl<sub>2</sub>, 1 mM TCEP, and 2 mM sodium  
543 orthovanadate. Time points were taken at 5, 20, and 60 minutes. Kinase activity was quenched with 25 mM EDTA  
544 and the cells were washed with PBS. Kinase-treated cells were labeled with roughly 0.05 mg/mL of the biotinylated  
545 pY20 antibody for an hour and then washed again with PBS containing 0.2% BSA.

546 The phosphorylated cells were isolated with Dynabeads<sup>®</sup> FlowComp<sup>™</sup> Flexi (Invitrogen) following the man-  
547 ufacturer's protocol. In total, two populations were collected for each time point: cells that did not bind to the  
548 magnetic beads and eluted after each wash (unbound) and cells that bound to the magnetic beads and eluted after  
549 the addition of the release buffer (bound). After isolation of these two populations, the cell pellet was collected,  
550 resuspended in water, and then lysed by boiling at 100 °C for 10 minutes. The supernatant from this lysate was  
551 then used as a template in a 50 μL PCR reaction to amplify the peptide-codon DNA sequence using the same  
552 forward and reverse TruSeq-eCPX primers as described previously<sup>53</sup>. The product of this PCR reaction was then  
553 used as a template for a second PCR reaction to append a unique 5' and 3' indices. The resulting PCR products  
554 were purified by gel extraction, and the concentration of each sample was determined using QuantiFluor<sup>®</sup> dsDNA  
555 System (Promega). Each sample was pooled to equal molarity and sequenced by paired-end Illumina sequencing  
556 on a MiSeq instrument. The deep sequencing data were processed as described previously<sup>53,64</sup>. The paired-end  
557 reads were merged using FLASH<sup>65</sup> and the adapter sequences were trimmed using the software Cutadapt<sup>66</sup>. The  
558 remaining sequences were translated into amino acid codes, and sequences containing stop codons were removed.

### 559 **Validation measurement of phosphorylation rates**

560 To validate predictions made by Probound, phosphorylation rates were determined *in vitro* using purified c-Src  
561 and 11 synthetic peptides (purchased from Synpeptide). The phosphorylation reactions were carried out at 37°C  
562 using 500 nM purified c-Src and 100 μM peptide in a buffer containing 50 mM Tris, pH 7.5, 150 mM NaCl, 5 mM  
563 MgCl<sub>2</sub>, 1 mM TCEP, and 2 mM sodium orthovanadate. Reactions were initiated by the addition of 1 mM ATP, and  
564 at various time points, 100 μL of the solution was quenched with 25 mM EDTA (every 10s for the faster reactions,  
565 every 2-10m for the slower reactions). Each reaction was carried out in triplicate.

566 The concentration of the substrate and the phosphorylated product at each time point was determined by reversed-  
567 phase HPLC with UV detection at 214 nm (Agilent 1260 Infinity II). A 40 μL volume of the quenched reaction  
568 was injected onto a C18 column (ZORBAX 300SB-C18, 5μm, 4.6 x 150 mm). A gradient system was used with  
569 solvent A (water and 0.1% TFA) and solvent B (acetonitrile and 0.1% TFA). Elution of the peptides was performed  
570 at flow rate of 1 mL/min using the following gradient: 0-2 min: 5% B, 2-12 min: 5-95% B, 12-13 min: 95% B,  
571 13-14 min: 95-5% B, and 14-17 min: 5% B. The peak areas of the substrate and product were calculated using the  
572 Agilent OpenLAB software. The initial rate for each peptide was obtained by fitting a straight line to a graph of peak  
573 area as a function of time in the linear regime of the reaction progress curve and calculating the slope of the line.

## 574 **Acknowledgements**

575 Research reported in this publication was supported by NIMH award R01MH106842 and NHGRI award R01HG003008  
576 to H.J.B. and NIGMS award R35GM118336 to R.S.M. The content is solely the responsibility of the authors and  
577 does not necessarily represent the official views of the National Institutes of Health. We are grateful to John Hunt  
578 for valuable discussions about experimental methods for measuring dissociation constants.

## 579 **Author contributions statement**

580 H.T.R. and H.J.B. developed the methodology with significant contributions from C.R. H.T.R. implemented  
581 ProBound with contributions from C.R., B.V.D. and H.H.A. S.F. performed the  $K_D$ -seq experiments and vali-  
582 dation measurements under supervision of R.S.M. J.F.K. performed the SELEX-seq and EpiSELEX-seq experiments  
583 and developed the GLM analysis under supervision of R.S.M. and H.J.B. A.L. performed the Src sequencing and  
584 validation experiments under supervision of N.H.S. B.B. developed the web portal under supervision of H.J.S., H.T.R.  
585 and C.R. X.L. performed the ASB ChIP-seq analysis. L.A.N.M and H.T.R. performed GR ChIP-seq ProBound  
586 analysis. H.T.R., C.R. and H.J.B. wrote the manuscript with input from all authors.

## 587 **Code availability**

588 TF binding models and software for utilizing them can be accessed at [motifcentral.org](http://motifcentral.org). The ProBound  
589 software can be run on a dedicated compute server located at [probound.bussemakerlab.org](http://probound.bussemakerlab.org).

## 590 **Data availability**

591 The sequencing data generated during the current study have been deposited in the Gene Expression Omnibus (GEO,  
592 accession number GSE175942). Source data for Figs 4d and 6d have been provided in Supplemental Table 3 and 5.

## 593 **Competing Interests**

594 H.J.B., C.R., and H.T.R. have filed a patent application describing the design, composition and function of ProBound.

## 595 References

- 596 1. Lambert, S. A. *et al.* The human transcription factors. *Cell* **172**, 650–665 (2018).
- 597 2. Crocker, J. *et al.* Low affinity binding site clusters confer hox specificity and regulatory robustness. *Cell* **160**,  
598 191–203 (2015).
- 599 3. Farley, E. K. *et al.* Suboptimization of developmental enhancers. *Science* **350**, 325–328 (2015).
- 600 4. Tanay, A. Extensive low-affinity transcriptional interactions in the yeast genome. *Genome research* **16**, 962–972  
601 (2006).
- 602 5. Stormo, G. D. Dna binding sites: representation and discovery. *Bioinformatics* **16**, 16–23 (2000).
- 603 6. Zykovich, A., Korf, I. & Segal, D. J. Bind-n-seq: high-throughput analysis of in vitro protein–dna interactions  
604 using massively parallel sequencing. *Nucleic acids research* **37**, e151–e151 (2009).
- 605 7. Zhao, Y., Granas, D. & Stormo, G. D. Inferring binding energies from selected binding sites. *PLoS computational*  
606 *biology* **5** (2009).
- 607 8. Jolma, A. *et al.* Multiplexed massively parallel selex for characterization of human transcription factor binding  
608 specificities. *Genome research* **20**, 861–873 (2010).
- 609 9. Isakova, A. *et al.* Smile-seq identifies binding motifs of single and dimeric transcription factors. *Nat. methods*  
610 **14**, 316 (2017).
- 611 10. Slattery, M. *et al.* Cofactor binding evokes latent differences in dna binding specificity between hox proteins.  
612 *Cell* **147**, 1270–1282 (2011).
- 613 11. Jolma, A. *et al.* Dna-dependent formation of transcription factor pairs alters their binding specificity. *Nature*  
614 **527**, 384–388 (2015).
- 615 12. Rodriguez-Martinez, J. A., Reinke, A. W., Bhimsaria, D., Keating, A. E. & Ansari, A. Z. Combinatorial bzip  
616 dimers display complex dna-binding specificity landscapes. *Elife* **6**, e19272 (2017).
- 617 13. Zhu, F. *et al.* The interaction landscape between transcription factors and the nucleosome. *Nature* **562**, 76–81  
618 (2018).
- 619 14. Yin, Y. *et al.* Impact of cytosine methylation on dna binding specificities of human transcription factors. *Science*  
620 **356**, eaaj2239 (2017).
- 621 15. Kribelbauer, J. F. *et al.* Quantitative analysis of the dna methylation sensitivity of transcription factor complexes.  
622 *Cell reports* **19**, 2383–2395 (2017).
- 623 16. Zuo, Z., Roy, B., Chang, Y. K., Granas, D. & Stormo, G. D. Measuring quantitative effects of methylation on  
624 transcription factor–dna binding affinity. *Sci. advances* **3**, eaao1799 (2017).
- 625 17. Lambert, N. *et al.* Rna bind-n-seq: quantitative assessment of the sequence and structural binding specificity of  
626 rna binding proteins. *Mol. cell* **54**, 887–900 (2014).
- 627 18. Dominguez, D. *et al.* Sequence, structure, and context preferences of human rna binding proteins. *Mol. cell* **70**,  
628 854–867 (2018).
- 629 19. Zhou, J. *et al.* Deep profiling of protease substrate specificity enabled by dual random and scanned human  
630 proteome substrate phage libraries. *Proc. Natl. Acad. Sci.* **117**, 25464–25475 (2020).
- 631 20. Gee, M. H. *et al.* Antigen identification for orphan t cell receptors expressed on tumor-infiltrating lymphocytes.  
632 *Cell* **172**, 549–563 (2018).
- 633 21. Ruan, S., Swamidass, S. J. & Stormo, G. D. Beesem: estimation of binding energy models using ht-selex data.  
634 *Bioinformatics* **33**, 2288–2295 (2017).
- 635 22. Rastogi, C. *et al.* Accurate and sensitive quantification of protein-dna binding affinity. *Proc. Natl. Acad. Sci.*  
636 **115**, E3692–E3701 (2018).



- 637 **23.** Yuan, H., Kshirsagar, M., Zamparo, L., Lu, Y. & Leslie, C. S. Bindspace decodes transcription factor binding  
638 signals by large-scale sequence embedding. *Nat. methods* **16**, 858–861 (2019).
- 639 **24.** Toivonen, J. *et al.* Modular discovery of monomeric and dimeric transcription factor binding motifs for large  
640 data sets. *Nucleic acids research* **46**, e44–e44 (2018).
- 641 **25.** Asif, M. & Orenstein, Y. Deepselex: inferring dna-binding preferences from ht-selex data using multi-class  
642 cnns. *Bioinformatics* **36**, i634–i642 (2020).
- 643 **26.** Jolma, A. *et al.* Dna-binding specificities of human transcription factors. *Cell* **152**, 327–339 (2013).
- 644 **27.** Nitta, K. R. *et al.* Conservation of transcription factor binding specificities across 600 million years of bilateria  
645 evolution. *elife* **4**, e04837 (2015).
- 646 **28.** Yang, L. *et al.* Transcription factor family-specific dna shape readout revealed by quantitative specificity models.  
647 *Mol. systems biology* **13**, 910 (2017).
- 648 **29.** Weirauch, M. T. *et al.* Evaluation of methods for modeling transcription factor sequence specificity. *Nat.*  
649 *biotechnology* **31**, 126–134 (2013).
- 650 **30.** Alipanahi, B., DeLong, A., Weirauch, M. T. & Frey, B. J. Predicting the sequence specificities of dna-and  
651 rna-binding proteins by deep learning. *Nat. biotechnology* **33**, 831–838 (2015).
- 652 **31.** Davis, C. A. *et al.* The encyclopedia of dna elements (encode): data portal update. *Nucleic acids research* **46**,  
653 D794–D801 (2018).
- 654 **32.** Khan, A. *et al.* Jaspur 2018: update of the open-access database of transcription factor binding profiles and its  
655 web framework. *Nucleic acids research* **46**, D260–D266 (2018).
- 656 **33.** Kulakovskiy, I. V. *et al.* Hocomoco: towards a complete collection of transcription factor binding models for  
657 human and mouse via large-scale chip-seq analysis. *Nucleic acids research* **46**, D252–D259 (2018).
- 658 **34.** Kribelbauer, J. F. *et al.* Context-dependent gene regulation by homeodomain transcription factor complexes  
659 revealed by shape-readout deficient proteins. *Mol. Cell* (2020).
- 660 **35.** Weber, M. *et al.* Distribution, silencing potential and evolutionary impact of promoter dna methylation in the  
661 human genome. *Nat. genetics* **39**, 457–466 (2007).
- 662 **36.** Dantas Machado, A. C. *et al.* Evolving insights on how cytosine methylation affects protein–dna binding.  
663 *Briefings functional genomics* **14**, 61–73 (2015).
- 664 **37.** Zhu, H., Wang, G. & Qian, J. Transcription factors as readers and effectors of dna methylation. *Nat. Rev. Genet.*  
665 **17**, 551–565 (2016).
- 666 **38.** Kribelbauer, J. F., Lu, X.-J., Rohs, R., Mann, R. S. & Bussemaker, H. J. Towards a mechanistic understanding  
667 of dna methylation readout by transcription factors. *J. molecular biology* (2019).
- 668 **39.** Mann, I. K. *et al.* Cg methylated microarrays identify a novel methylated sequence bound by the cebpb1 atf4  
669 heterodimer that is active in vivo. *Genome research* **23**, 988–997 (2013).
- 670 **40.** Kumar, S., Chinnusamy, V. & Mohapatra, T. Epigenetics of modified dna bases: 5-methylcytosine and beyond.  
671 *Front. genetics* **9**, 640 (2018).
- 672 **41.** Fu, Y. *et al.* N6-methyldeoxyadenosine marks active transcription start sites in chlamydomonas. *Cell* **161**,  
673 879–892 (2015).
- 674 **42.** Xiao, C.-L. *et al.* N6-methyladenine dna modification in the human genome. *Mol. cell* **71**, 306–318 (2018).
- 675 **43.** Wu, T. P. *et al.* Dna methylation on n 6-adenine in mammalian embryonic stem cells. *Nature* **532**, 329–333  
676 (2016).
- 677 **44.** Kriaucionis, S. & Heintz, N. The nuclear dna base 5-hydroxymethylcytosine is present in purkinje neurons and  
678 the brain. *Science* **324**, 929–930 (2009).

- 679 **45.** Münzel, M. *et al.* Quantification of the sixth dna base hydroxymethylcytosine in the brain. *Angewandte Chemie*  
680 *Int. Ed.* **49**, 5375–5377 (2010).
- 681 **46.** Zuo, Z. & Stormo, G. D. High-resolution specificity from dna sequencing highlights alternative modes of lac  
682 repressor binding. *Genetics* **198**, 1329–1343 (2014).
- 683 **47.** Starick, S. R. *et al.* Chip-exo signal associated with dna-binding motifs provides insight into the genomic  
684 binding of the glucocorticoid receptor and cooperating transcription factors. *Genome research* **25**, 825–835  
685 (2015).
- 686 **48.** Polman, J. A. E., de Kloet, E. R. & Datson, N. A. Two populations of glucocorticoid receptor-binding sites in  
687 the male rat hippocampal genome. *Endocrinology* **154**, 1832–1844 (2013).
- 688 **49.** Luisi, B. F. *et al.* Crystallographic analysis of the interaction of the glucocorticoid receptor with dna. *Nature*  
689 **352**, 497–505 (1991).
- 690 **50.** Glass, C. K. Differential recognition of target genes by nuclear receptor monomers, dimers, and heterodimers.  
691 *Endocr. reviews* **15**, 391–407 (1994).
- 692 **51.** Biddie, S. C. *et al.* Transcription factor ap1 potentiates chromatin accessibility and glucocorticoid receptor  
693 binding. *Mol. cell* **43**, 145–155 (2011).
- 694 **52.** Liu, G. *et al.* Antibody complementarity determining region design using high-capacity machine learning.  
695 *Bioinformatics* **36**, 2126–2133 (2020).
- 696 **53.** Shah, N. H., Löbel, M., Weiss, A. & Kuriyan, J. Fine-tuning of substrate preferences of the src-family kinase  
697 lck revealed through a high-throughput specificity screen. *Elife* **7**, e35190 (2018).
- 698 **54.** Ryu, G.-M. *et al.* Genome-wide analysis to predict protein sequence variations that change phosphorylation  
699 sites or their corresponding kinases. *Nucleic acids research* **37**, 1297–1307 (2009).
- 700 **55.** Hornbeck, P. V. *et al.* Phosphositeplus, 2014: mutations, ptms and recalibrations. *Nucleic acids research* **43**,  
701 D512–D520 (2015).
- 702 **56.** Maerkl, S. J. & Quake, S. R. A systems approach to measuring the binding energy landscapes of transcription  
703 factors. *Science* **315**, 233–237 (2007).
- 704 **57.** Foat, B. C., Morozov, A. V. & Bussemaker, H. J. Statistical mechanical modeling of genome-wide transcription  
705 factor occupancy data by matrixreduce. *Bioinformatics* **22**, e141–e149 (2006).
- 706 **58.** Badis, G. *et al.* Diversity and complexity in dna recognition by transcription factors. *Science* **324**, 1720–1723  
707 (2009).
- 708 **59.** Berger, M. F. *et al.* Variation in homeodomain dna binding revealed by high-resolution analysis of sequence  
709 preferences. *Cell* **133**, 1266–1276 (2008).
- 710 **60.** Weirauch, M. T. *et al.* Determination and inference of eukaryotic transcription factor sequence specificity. *Cell*  
711 **158**, 1431–1443 (2014).
- 712 **61.** Zhao, Y. & Stormo, G. D. Quantitative analysis demonstrates most transcription factors require only simple  
713 models of specificity. *Nat. biotechnology* **29**, 480–483 (2011).
- 714 **62.** Riley, T. R. *et al.* Selex-seq: a method for characterizing the complete repertoire of binding site preferences for  
715 transcription factor complexes. In *Hox Genes*, 255–278 (Springer, 2014).
- 716 **63.** Rice, J. J. & Daugherty, P. S. Directed evolution of a biterminal bacterial display scaffold enhances the display  
717 of diverse peptides. *Protein Eng. Des. & Sel.* **21**, 435–442 (2008).
- 718 **64.** Shah, N. H. *et al.* An electrostatic selection mechanism controls sequential kinase signaling downstream of the t  
719 cell receptor. *Elife* **5**, e20105 (2016).
- 720 **65.** Magoč, T. & Salzberg, S. L. Flash: fast length adjustment of short reads to improve genome assemblies.  
721 *Bioinformatics* **27**, 2957–2963 (2011).

- 722 **66.** Martin, M. Cutadapt removes adapter sequences from high-throughput sequencing reads. *EMBnet. journal* **17**,  
723 10–12 (2011).

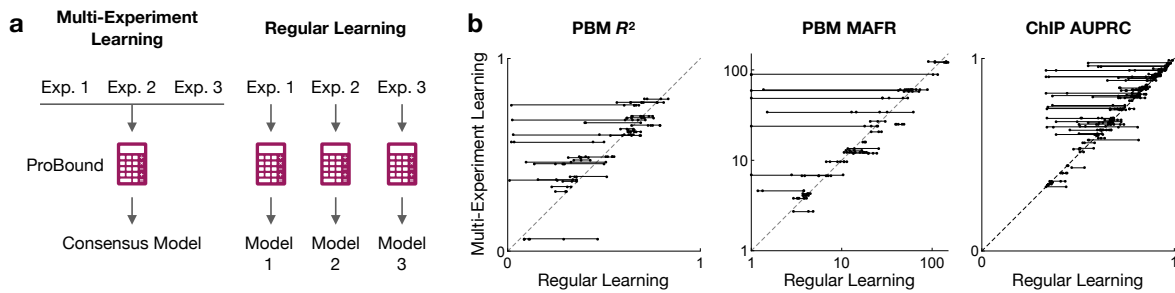

**Figure S1: Integrative analysis of multiple TF SELEX datasets produces consensus binding models.** (a) Schematic contrasting ProBound's multi-experiment learning strategy that builds a consensus model for a TF by simultaneously training on all relevant SELEX data for the TF with the traditional approach that builds independent models for every individual dataset. (b) Generalization performance of consensus binding models (y-axis) and single-experiment models (x-axis) on three different metrics (scatterplots). Points correspond to models trained on individual experiments and lines connect experiments used to build the corresponding consensus model. Points above the diagonal correspond to instances where the consensus model outperforms single-experiment models.

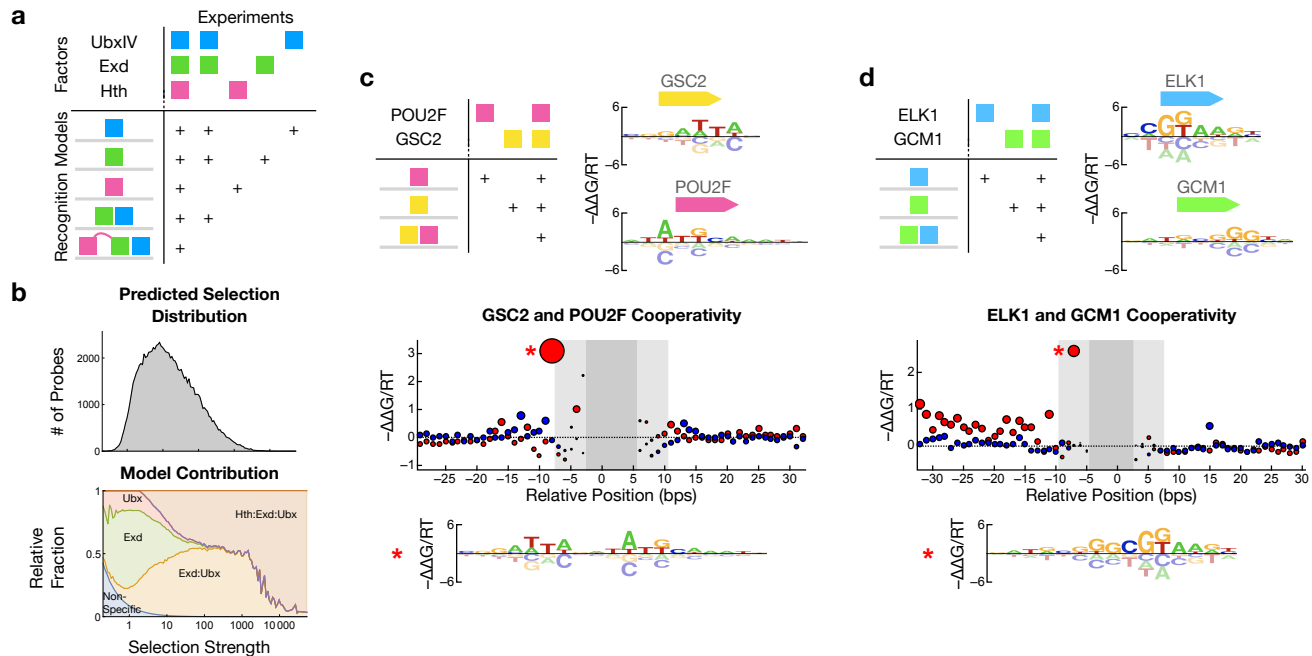

**Figure S2: Integrative modeling to quantify TF binding cooperativity.** (a) Schematic table describing the combinations of TFs assayed in five experiments (top) that were jointly analyzed to produce recognition models of the different monomers and their complexes (bottom) by explicitly defining which models can form in each experiment (+ sign). (b) Distribution of probes (top) and the predicted relative contribution of every recognition mode (bottom) as a function of predicted binding selection strength (x-axis) in the first round of selection from SELEX-seq data assaying Hth, Exd, and UbxIV. (c) Integrative modeling of HT-SELEX and CAP-SELEX data for POU2F and GSC2 (schematic table) yields recognition models for the monomers (motifs) and binding cooperativity for GSC2:POU2F (scatterplot) as a function of relative position (x-axis) and orientation (red: parallel; blue: anti-parallel). Motif (below) shows the configuration indicated on the plot. (d) Same as (c), except for the factors ELK1 and GCM1.



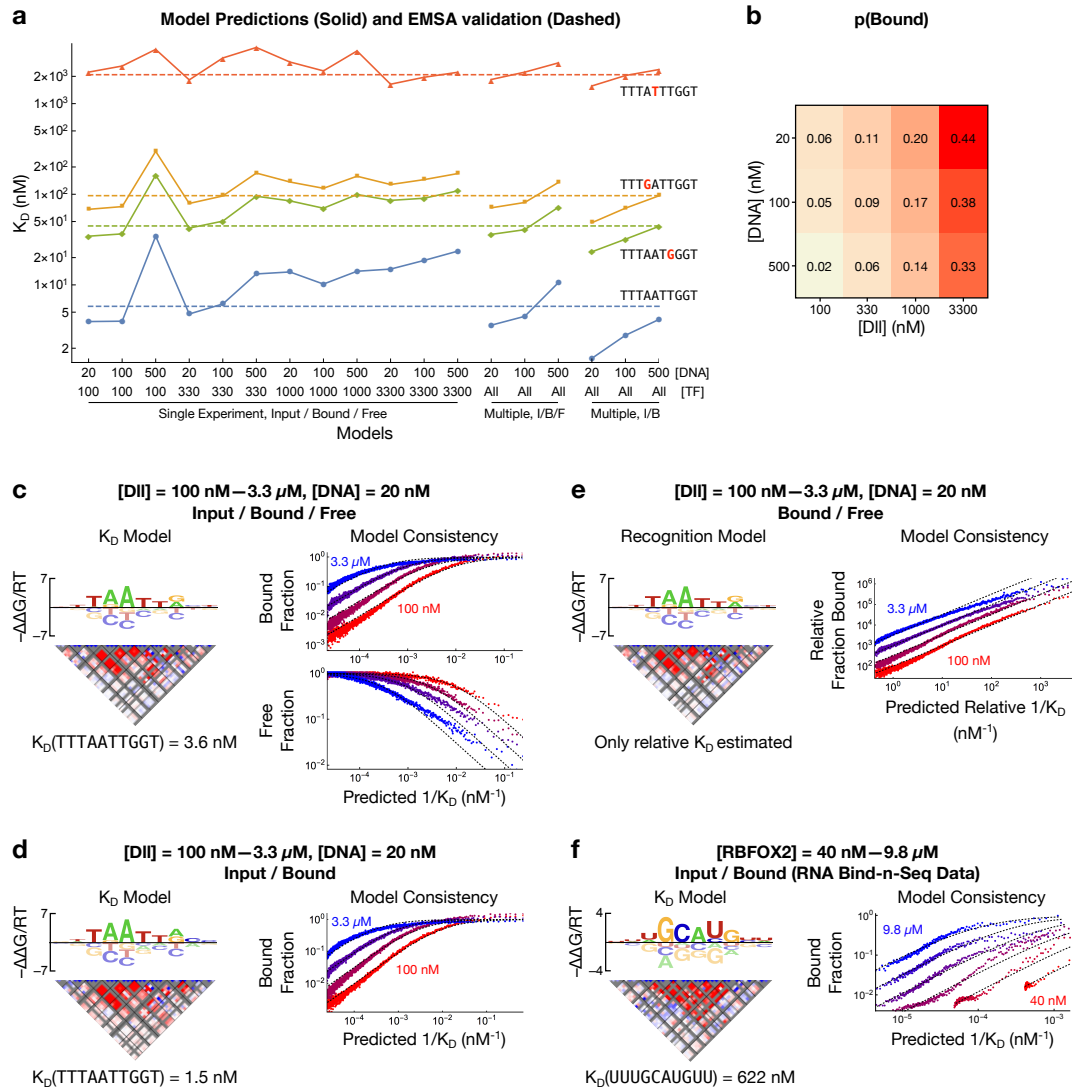

**Figure S5: The robustness of  $K_D$ -seq.** (a) Comparison between EMSA-measured (dashed line) and different model-predicted (points)  $K_D$  values for four binding probes (text). Various model training strategies (x-axis) leveraged different sequencing libraries: the input/bound/free libraries from a single experiment (left); the input/bound/free libraries from multiple experiments at different TF concentrations (center); or the input/bound libraries from multiple experiments at different TF concentrations (right). (b) Fraction of DNA bound as inferred by ProBound when learning binding models from individual  $K_D$ -seq experiments (c.f. left points in (a)). (c) Example  $K_D$  model (left) and observed and predicted probe enrichments (right; c.f. Fig. 4c) for a model from the central points in (a). (d) Same as (c), but for a model from the right points in (a). (e) Same as (c), but only using the bound/free libraries (analogous to Spec-seq). This model can only predict relative  $K_D$ , as the bound/free ratio is proportional to  $K_D^{-1}$  for all TF concentrations. In addition, the model predicts enrichment in the data up to a global rescaling factor. (f) Same as (d), but for a model derived from RNA Bind-n-Seq data for RBFOX2.

## 724 Supplemental Methods

### 725 Software Manual

726 ProBound can be run on a dedicated compute server located at [probound.bussemakerlab.org](http://probound.bussemakerlab.org). As input,  
727 this server takes a configuration file and a collection of count tables. The configurations file is in the JSON format  
728 and consists of a series of function calls:

```
729 [
730   { "function": "functionName1", "variableName1": "value1", ...},
731   { "function": "functionName2", "variableName1": "value1", ...},
732   ...
733 ]
```

734 These functions configure the model components (binding modes, interactions, count tables, and enrichment models),  
735 configure the optimizer, set custom alphabets, and configure the output. For each of the components, there are  
736 functions that configure the basic parameters, functions that set custom seeding, and functions determine how  
737 the component is optimized. Below we provide documentation for these functions. In addition, we provide the  
738 configuration files that were used for the fits presented in the main text.

### 739 **Count tables**

- 740 ● `addTable`: This function adds a count table (containing the SELEX data) to the model.
  - 741 – `countTableFile` (string, required): Path to the count table file. The table should be tab separated,  
742 have the variable region of the probe sequences in the first columns, and have the number of occurrences  
743 of each probe in each SELEX library in the following columns. This file can be gzipped. All sequences  
744 must have equal length.
  - 745 – `inputFileType` (string, default is `tsv`): Format of the input file. Can either be `tsv` or `tsv.gz`.
  - 746 – `nColumns` (integer, required): Number of columns with probe counts in the count table (that is, the  
747 first column, containing probe sequences, is not counted) .
  - 748 – `variableRegionLength` (integer, required): Length of the sequences in the count table.
  - 749 – `rightFlank` (string, default is `" "`): Specifies the constant sequence flanking the variable region to  
750 the right.
  - 751 – `leftFlank` (string, default is `" "`): Specifies the constant sequence flanking the variable region to the  
752 left.
  - 753 – `modeledColumns` (list of integer, default is `[-1]`): Specifies what columns in the count table should  
754 be modeled. By default, all columns are included as indicated by `'-1'`.
  - 755 – `transliterate` (objects, default is `{"in": [], "out": []}`): List of edits that should be made  
756 to the probe sequences in order to encode DNA modifications. `in` lists the probe subsequence that  
757 should be substituted and `out` lists the substitutes. The lists `in` and `out` must have equal length, and  
758 each pair of sequences must have equal length.

### 759 **Enrichment models**

- 760 ● `addSELEX`: This function adds an enrichment model to the overall model. Enrichment models are one-to-one  
761 associated with count tables in sequential order.
  - 762 – `modelType` (string, default is `SELEX`): Type of enrichment model. Possible choices are `SELEX`,  
763 `rhoGamma`, and `ExponentialKinetics`.

- 764       – `bindingModes` (list of integer, default is `[-1]`): Specifies what binding modes should be included  
765       in the enrichment model. `[-1]` includes all binding modes.
- 766       – `bindingModeInteractions` (list of integer, default is `[-1]`): Specifies what binding mode  
767       interactions should be included in the enrichment model. `[-1]` includes all interactions.
- 768       – `cumulativeEnrichment` (boolean, default is `true`): Specifies whether the enrichment should  
769       accumulate across columns to model repeated SELEX selection.
- 770       – `concentration` (float, default is `1`): Specifies the fixed concentration factor that multiples all  
771       activities used by the enrichment model.
- 772       – `bindingSaturation` (boolean, default is `false`): Option for SELEX enrichment models indicat-  
773       ing whether the selection should be linear ( $\propto x$ ) or or saturated ( $\propto x/(1+x)$ ).
- 774       • `enrichmentModelSeed`: This function specifies seeding of parameters for the enrichment model.
  - 775       – `rho` (list of floats): Option for `rhoGamma` models seeding  $\rho_r$  for each round  $r$ .
  - 776       – `gamma` (list of floats): Option for `rhoGamma` models seeding  $\gamma_r$  for each round  $r$ .
- 777       • `enrichmentModelConstraints`: Function specifying constraints on the parameters in the enrichment  
778       model and how they should be optimized.
  - 779       – `fitRho` (boolean, default is `false`): Option for `rhoGamma` models specifying whether  $\rho$  should be  
780       optimized.
  - 781       – `fitGamma` (boolean, default is `false`): Option for `rhoGamma` models specifying whether  $\gamma$  should  
782       be optimized.
  - 783       – `roundSpecificRho` (boolean, default is `true`): Option for `rhoGamma` models specifying whether  
784        $\rho_r$  can take independent values for each round  $r$ .
  - 785       – `roundSpecificGamma` (boolean, default is `true`): Option for `rhoGamma` models specifying  
786       whether  $\gamma_r$  can take independent values for each round  $r$ .
  - 787       – `trySaturation` (boolean, default is `false`): Option for SELEX models specifying whether the  
788       optimizer should test if setting `bindingSaturation=true` improves the model.

### 789 **Binding modes**

- 790       • `addBindingMode`: This function adds a binding mode to the model and assigns it a running index, starting  
791       at 0.
  - 792       – `size` (integer, required): The width of the binding mode
  - 793       – `flankLength` (integer, default is `0`): Distance into the fixed flanking region that is scored by the  
794       binding mode.
  - 795       – `dinuclotideDistance` (integer, default is `0`): Maximum distance between the two letters of  
796       the dimer sequence features that are included in the  $\Delta\Delta G$  model. `0` inactivates the dimer features, `1`  
797       includes only adjacent letters, such as `CG`.
  - 798       – `singleStrand` (boolean, default is `false`): True indicates that only the forward should be scored  
799       and included in  $Z_{\text{bound}}$ .



- 800       – `positionBias` (boolean, default is `false`): Indicates whether the position-bias factor should be  
801       included ( $\omega_a(x)$  is then a free) or not ( $\omega_a(x) = 1$ ).
  
- 802       • `addNS`: Adds a non-specific binding mode (shorthand function for adding a mode with `size=0`). This  
803       function takes no arguments.
  
- 804       • `bindingModeSeed`: This function sets the seeding (the initial values of the parameters, before optimization)  
805       of the binding mode.
  - 806       – `index` (integer): Index of the binding mode for which the seeding is specified. The seeding is applied  
807       to all binding modes if no index is specified.
  
  - 808       – `mononucleotideIUPAC` (string): Seeds the binding mode to recognize the sequences consistent  
809       with the IUPAC string. At each position, matches get  $\beta_{a,\phi} = 0$  and mismatches get  $\beta_{a,\phi} = -1$ .
  
  - 810       – `mononucleotideString` (string): Seeds the binding mode to recognize sequences consistent with  
811       the string. At each position, matches get  $\beta_{a,\phi} = 1$  and mismatches give  $\beta_{a,\phi} = 0$ . The period character  
812       (`.`) is a wildcard and matches any letter.
  
- 813       • `bindingModeConstraints`: This function specifies both constraints imposed on the binding mode  
814       during optimization and strategies used to optimize the it.
  - 815       – `index`, integer, required: Index of the binding mode that will be manipulated.
  
  - 816       – `symmetryString` (string, default is `null`): This string defines a symmetry on the binding mode.  
817       Two formats are possible:
    - 818       \* The first format specifies a symmetry by using letters and digits to identify equivalent positions in  
819       the binding mode. Upper and lower case letters are related through complement and digits are  
820       self-complementary. For example, the string `ab1BA` specifies a reverse-complement symmetric  
821       binding mode of size five. Here complementarity relates `a`  $\leftrightarrow$  `A`, `b`  $\leftrightarrow$  `B`, and `1`  $\leftrightarrow$  `1`. The string  
822       `ab1BAab1BA` specifies a 10bp binding site with a tetrameric symmetry. The pipe sign (`|`) is a  
823       barrier for dinucleotide interactions. This divides the binding mode into regions and removes  
824       dinucleotide interactions that connect different regions.
  
    - 825       \* The second format specifies a sequence of blocks that together fill in the binding mode. Each  
826       block is assigned an ID number and two block with the same ID have identical sequence recog-  
827       nition. A block with a negative ID is the reverse complement of a blocks with same but posi-  
828       tive ID. Each block can be constrained to be reverse complement symmetric. For example,  
829       the symmetry string: `1:6:True` corresponds to a 6bp reverse-complement symmetric block,  
830       `1:3:False,1:3:False` corresponds to two concatenated 3bp blocks in head-to-tail con-  
831       figuration, `1:3:False,-1:3:False` corresponds to a two 3bp blocks in the head-to-head  
832       configuration. Recognition of dimer sequence features that span blocks are prohibited.
  
- 833       Note that the footprint of a binding mode cannot be modified if a symmetry is specified since the  
834       expanded binding mode would no longer have the size specified by the symmetry string.
  
- 835       – `roundSpecificActivity` (boolean, default is `true`): Indicates whether the binding mode activi-  
836       ties can take different values in different SELEX rounds (columns in the count table).
  
- 837       – `experimentSpecificActivity` (boolean, default is `true`): Indicates whether the binding mode  
838       activities can take different values in different experiments (count tables).

- 839       – `experimentSpecificPositionBias` (boolean, default is `true`): Indicates whether the posi-  
840       tion bias parameters can take different values in different experiments. This must be `true` if the  
841       experiments have different probe lengths.
- 842       – `optimizeSize` (boolean, default is `false`): Indicates whether the size of the binding mode should  
843       be optimized. If `true`, the binding mode is (separately) expanded to the left and to the right, the model  
844       parameters are re-optimized, and the expanded binding mode is kept if the likelihood improved.
- 845       – `optimizeSizeHeuristic` (boolean, default is `false`): Same as `optimizeSize` but the bind-  
846       ing mode is expanded both to the left and right (simultaneously) and the flank length is incremented.
- 847       – `optimizeFlankLength` (boolean, default is `false`): Indicates whether the flank length should be  
848       optimized. If `true`, the flank length is incremented, the model parameters are re-optimized, and the  
849       new model is kept if the likelihood improved.
- 850       – `optimizeMotifShift` (boolean, default is `false`): Indicates whether shifted versions of the  
851       binding mode should be explored. If `true`, the motif is binding model is shifted to the left and  
852       right (separately), the model parameters are re-optimized, and the new model is kept if the likelihood  
853       improved.
- 854       – `optimizeMotifShiftHeuristic` (boolean, default is `false`): Same as `optimizeMotifShift`  
855       but only a single shift is tested. This shift is found by first computing the information content for each  
856       position in the binding mode, then computing the 'center of mass' of the information content, and  
857       finally computing the shift such that the center of mass is at the center of the binding mode.
- 858       – `maxSize` (integer, default is `-1`): Specifies an upper limit of the binding mode size. `-1` indicates no  
859       limit.
- 860       – `maxFlankLength` (integer, default is `-1`): Specifies an upper limit of to the flank length. `-1` indicates  
861       no limit.
- 862       – `informationThreshold` (float, default is `0.1`): Threshold on the information content (computed  
863       for the first two and last two bases in the binding mode) determining whether `optimizeSize` and  
864       `optimizeSizeHeuristic` should attempt to expand the binding mode to the left and right.
- 865       – `positionBiasBinWidth` (integer, default is `1`): This setting configures the set of possible binding  
866       configurations in the probe sequence to be partitioned into bins with specified width and constrains the  
867       position-bias parameters  $\omega_a(x)$  (where  $x$  is a configuration) to be constant in each bin, thus reducing  
868       the number of independent parameters. By default, each bin contains a single configuration and no  
869       constraint is thus imposed.
- 870       – `fittingStages` (list of JSON objects, default is `[]`): This setting instructs the optimizer to ex-  
871       plore variations of the binding mode using a sequence of fitting stages. Each fitting stage can use a  
872       different set of variations and is defined by a JSON object that maps the included variations to `true`.  
873       The variations are: `optimizeSize`, `optimizeSizeHeuristic`, `optimizeFlankLength`,  
874       `optimizeMotifShift` and `optimizeMotifShiftHeuristic`.
- 875       • `symmetry`: Shorthand function for specifying the symmetry of a binding mode:
  - 876       – `index` (integer, required): Specifies the index of symmetric binding mode
  - 877       – `symmetryString` (string): Specifies the symmetry using the same format as in `bindingModeConstraints`.

## 878 **Interactions**

- 879 • `addInteraction`: Function for adding interactions between binding modes.
  - 880 – `bindingModes` (list containing two integers, required): Indices of the interacting binding modes.
  - 881 – `positionBias` (boolean, default is `false`): If `true`, the binding mode interaction  $\omega_a(x,y)$  have
  - 882 independent value for each value of the binding mode configurations  $x$  and  $y$ . If `false`, the binding
  - 883 mode interaction is translationally invariant and only depends on  $x - y$  (where  $x$  and  $y$  are strand-aware
  - 884 coordinates).
  - 885 – `maxOverlap` (integer, 0): Maximum allowed overlap of the binding modes.
  - 886 – `maxSpacing` (integer, default is `-1`): Maximum allowed spacing between the binding modes. `-1`
  - 887 indicates no limit.
- 888 • `interactionConstraints`: This function specifies constraints imposed on the binding mode interaction
- 889 during optimization.
  - 890 – `index` (integer, required): Index of the constrained binding mode interaction.
  - 891 – `roundSpecificActivity` (boolean, default is `true`): Indicates whether the binding mode inter-
  - 892 action activities can take different values in different SELEX rounds (columns in the count table).
  - 893 – `experimentSpecificActivity` (boolean, default is `true`): Indicates whether the binding mode
  - 894 interaction activities can take different values in different experiments (count tables).
  - 895 – `experimentSpecificInteraction` (boolean, default is `false`): Indicates whether the bind-
  - 896 ing mode interaction can take different values in different experiments. This must be `true` if
  - 897 `positionBias=true` and the experiments have different probe lengths.

## 898 **General settings**

- 899 • `output`: Function specifying where and how the output should be written.
  - 900 – `outputPath` (string, required): Path to the output directory.
  - 901 – `baseName` (string, required): String specifying the beginning of output file names (shared between all
  - 902 output files).
  - 903 – `printTrajectory` (boolean, default is `false`): Indicates whether the optimizer trajectory should
  - 904 be saved.
  - 905 – `verbose` (boolean, default is `false`): Indicates whether the message output to `STDOUT` should be
  - 906 verbose.
- 907 • `optimizerSetting`: This function configures the optimizer and accepts the following variables:
  - 908 – `lambdaL2` (float, default is `1-e7`): Weight  $\lambda$  of the  $L_2$  regularizer.
  - 909 – `pseudocount` (float, default is 0): Value of  $k_{\text{Dirichlet}}$  (determining the weight of the Dirichlet regular-
  - 910 izer).
  - 911 – `expBound` (float, default is 40): Parameter  $\theta_{\text{max}}$  of the exponential barrier regularizer.
  - 912 – `nThreads` (integer, default is 4): Number of threads used for parallelization.

- 913        – `nRetries` (integer, default is 3): Number of retries that are made after numerical failures before the  
914           optimizer proceeds to the next step.
- 915        – `likelihoodThreshold` (integer, default is 0): Smallest likelihood improvement required for a  
916           variation of a model component to be accepted.
- 917        • `lbfgsSettings`: This function specifies options for the L-BFGS optimizer.
  - 918           – `memory` (integer, default is 100): Number of previous steps kept in memory
  - 919           – `maxIters` (integer, default is 500): Maximum number of iterations.
  - 920           – `convergence` (float, default is  $1e-7$ ): Convergence criteria.
- 921        • `setAlphabet`: Function specifying the alphabet.
  - 922           – `letterOrder` (string, default is ACGT): String specifying the set of valid letters and their order.
  - 923           – `letterComplement` (string, default is "C-G, A-T"): String specifying what letters are mapped to  
924           each other by the complementarity transformation. The two letters in a pair are connected by a dash  
925           sign and pairs are separated by comma signs.

## 926 Output

927 ProBound outputs the model parameters in the form of a JSON Object. This object has the keys:

- 928        • `countTable`: List of JSON Objects with the parameters for the count table models. Each object has the  
929           form:
  - 930           – `h`: List containing the values of  $h_r \equiv \ln \eta_r$ , where the index  $r$  runs over rounds.
- 931        • `enrichmentModel`: List of JSON Objects with the parameters for the enrichment models. The only  
932           enrichment model with parameters is `rhoGamma`:
  - 933           – `rho`: List containing the values of  $\rho_r$  where the index  $r$  runs over rounds.
  - 934           – `gamma`: List containing the values of  $\gamma_r$  where the index  $r$  runs over rounds.
- 935        • `bindingModes`: List of JSON Objects with the parameters for the binding modes. Each object has the  
936           form:
  - 937           – `activity`: Two-level nested list containing the binding mode activities  $\alpha_{e,r}$ , where the indices  $e$  runs  
938           over experiments (count tables) and  $r$  runs over SELEX rounds (columns in the table).
  - 939           – `mononucleotide`: Single-level list containing the mononucleotide binding mode coefficients in  $\vec{\beta}_a$   
940           for binding mode  $a$ . This list can be thought of as a flattened PSAM: Letter  $c$  at position  $x$  in the PSAM  
941           has index  $L * x + c$ , where  $L$  is the length of the alphabet. For the standard alphabet this corresponds to:  
942            $\{\beta_{A,1}, \beta_{C,1}, \beta_{G,1}, \beta_{T,1}, \beta_{A,2} \dots\}$ .
  - 943           – `dinucleotide`: Two-level list containing the dinucleotide binding mode coefficients in  $\vec{\beta}_a$  for  
944           binding mode  $a$ . The first index specifies the spacing between the interacting letters (0 is NN, 1 is N.N,  
945           etc). The second index can be thought of as a flattened dinucleotide PSAM: A dinucleotide feature with  
946           letters  $c_1$  and  $c_2$  and with the first letter on position  $x$  has index  $L^2x + Lc_1 + c_2$ , where  $L$  is the length of  
947           the alphabet. For the standard alphabet this corresponds to  $\{\beta_{AA,1}, \beta_{AC,1}, \beta_{AG,1}, \beta_{AT,1}, \beta_{CA,1} \dots\}$ .

- 948       – `positionBias`: Three-level list containing the position bias  $\ln \omega(x)$ . The indices are: (1) experiment,  
949       (2) stand, and (3) position in the sequence. The position is specified in the 5’-3’ direction, meaning that  
950       the first position of the binding mode on the forward and reverse strands are on the opposite ends of the  
951       sequence.
- 952       • `bindingModeInteractions`: List of JSON Objects with the parameters for the binding mode interac-  
953       tions. Each object has the form:
- 954       – `activity`: Two-level nested list containing the binding mode interaction activities  $\alpha_{e,r}$ , where the  
955       indices  $e$  runs over experiments (count tables) and  $r$  runs over SELEX rounds (columns in the table).
- 956       – `positionMatrix`: Five-level list containing the binding mode interaction  $\ln \omega(x,y)$ . The indices  
957       are: (1) experiment, (2) stand of the first binding mode, (3) strand of the second binding mode, (4)  
958       position of the first binding mode in the sequence, and (5) position of the second binding mode in the  
959       sequence. The positions are specified in the 5’-3’ direction, meaning that the first position of a binding  
960       mode on the forward and reverse strands are on the opposite ends of the sequence.

### 961 **ProBound configuration used in paper**

962 ProBound was run with a variety of settings in order to learn the binding models shown in the figures. The  
963 corresponding JSON builder objects are provided below. These settings utilize two builder functions `addTableDB`  
964 and `outputDB` that only work in our internal computational environment, but both these functions can be substituted.  
965 For example,

```
966 {"function": "addTableDB", "count_table_id": 2600 }
```

967 loads a count table with internal count table ID 2600 using our database. This function call should be replaced with:

```
968 {"function": "addTable", "countTableFile": "UbxIVa-Hth-Exd.30mer1.tsv.gz",  
969       "inputFileType": "tsv.gz", "variableRegionLength": 30, "nColumns": 4,  
970       "leftFlank": GTTCAGAGTTCTACAGTCCGACGATC,  
971       "rightFlank": CCCGGGTCGTATGCCGTCTTCTGCTTG }
```

972 The variable values for all count tables used below can be found in Supplemental Table 2 and 3. This table  
973 also contains the accession numbers for the published sequencing data used to generate the count tables (such as  
974 `UbxIVa-Hth-Exd.30mer1.tsv.gz`). The second internal function is

```
975 {"function": "outputDB", "fit_id": 6595 }
```

976 This function sets the ProBound output files using our internal database. This function call should be replaced with

```
977 {"function": "output", "outputPath": "/path/to/output", "baseName": "fit",  
978       "printTrajectory": true, "verbose": true }
```

979 This function directs the output to the directory `"/path/to/output"` and names of the output files start with `fit`.  
980 Finally, some of the settings below seed the binding mode to have the sequence readout at the center. The seeding  
981 strings were based on earlier unseeded fits that are not shown. These unseeded fits explored different sizes, shifts,  
982 and flank lengths of the binding modes using `optimizeFlankLength`, `optimizeMotifShiftHeuristic`,  
983 and `optimizeSizeHeuristic` as illustrated by the first setting below.

## 984 **TF binding models, single-experiment**

985 In benchmarking ProBound, each training dataset was analyzed using three settings and the best binding model was  
986 then selected based on its ability to explain the training data (see Methods). The first setting utilized one non-specific  
987 binding mode (constant across sequences) and two PSAM binding modes. The size, frame shift and flank length of  
988 the PSAM binding modes were all optimized sequentially:

```
989 [
990 {"function": "optimizerSetting", "lambdaL2": 1e-6, "pseudocount": 20,
991   "likelihoodThreshold": 0.0002 },
992 {"function": "addTableDB", "count_table_id": tableId },
993 {"function": "addSELEX" },
994 {"function": "addNS" },
995 {"function": "addBindingMode", "size": 12, "flankLength": 5},
996 {"function": "addBindingMode", "size": 12, "flankLength": 5},
997 {"function": "bindingModeConstraints", "index": 1, "maxFlankLength": -1,
998   "maxSize": 18, "fittingStages": [
999     { "optimizeFlankLength": true },
1000     { "optimizeMotifShiftHeuristic": true },
1001     { "optimizeSizeHeuristic": true } ] },
1002 {"function": "bindingModeConstraints", "index": 2, "maxFlankLength": -1,
1003   "maxSize": 18, "fittingStages": [
1004     { "optimizeFlankLength": true },
1005     { "optimizeMotifShiftHeuristic": true },
1006     { "optimizeSizeHeuristic": true } ] },
1007 {"function": "outputDB", "fit_id": fitID }
1008 ]
```

1009 Here metadata for each count table (variableRegionLength, nColumns, leftFlank, rightFlank, and,  
1010 when available, data accession numbers) is available in Supplemental Table 2. The second binding setting was  
1011 equivalent to the first except for two changes: the non-specific binding mode was replaced by a 1bp PSAM that can  
1012 absorb some sequence bias, and only the first and lasts available SELEX round was used:

```
1013 [
1014 {"function": "optimizerSetting", "lambdaL2": 1e-6, "pseudocount": 20,
1015   "likelihoodThreshold": 0.0002 },
1016 {"function": "addTableDB", "count_table_id": tableID,
1017   "modeledColumns": [rFirst, rLast] },
1018 {"function": "addSELEX"},
1019 {"function": "addBindingMode", "size": 1, "singleStrand": true,
1020   "positionBias": true},
1021 {"function": "addBindingMode", "size": 12, "flankLength": 5},
1022 {"function": "addBindingMode", "size": 12, "flankLength": 5},
1023 {"function": "bindingModeConstraints", "index": 1, "maxFlankLength": -1,
1024   "maxSize": 18, "fittingStages": [
1025     { "optimizeFlankLength": true },
1026     { "optimizeMotifShiftHeuristic": true },
1027     { "optimizeSizeHeuristic": true } ] },
1028 {"function": "bindingModeConstraints", "index": 2, "maxFlankLength": -1,
1029   "maxSize": 18, "fittingStages": [
1030     { "optimizeFlankLength": true },
```

```
1031         { "optimizeMotifShiftHeuristic": true },
1032         { "optimizeSizeHeuristic": true           } ] },
1033 {"function": "outputDB", "fit_id": fitID }
1034 ]
```

1035 Here `rFirst` and `rLast` should be replaced with the zero-based index of the first and last available SELEX round.  
1036 The third setting was also identical to the first except it learned three PSAM binding modes:

```
1037 [
1038 {"function": "optimizerSetting", "lambdaL2": 1e-6, "pseudocount": 20,
1039     "likelihoodThreshold": 0.0002 },
1040 {"function": "addTableDB", "count_table_id": tableID },
1041 {"function": "addSELEX" },
1042 {"function": "addNS" },
1043 {"function": "addBindingMode", "size": 6, "flankLength": 5},
1044 {"function": "addBindingMode", "size": 6, "flankLength": 5},
1045 {"function": "addBindingMode", "size": 6, "flankLength": 5},
1046 {"function": "bindingModeConstraints", "index": 1, "maxFlankLength": -1,
1047     "maxSize": 14, "fittingStages": [
1048         { "optimizeFlankLength": true           },
1049         { "optimizeMotifShiftHeuristic": true },
1050         { "optimizeSizeHeuristic": true           } ] },
1051 {"function": "bindingModeConstraints", "index": 2, "maxFlankLength": -1,
1052     "maxSize": 14, "fittingStages": [
1053         { "optimizeFlankLength": true           },
1054         { "optimizeMotifShiftHeuristic": true },
1055         { "optimizeSizeHeuristic": true           } ] },
1056 {"function": "bindingModeConstraints", "index": 3, "maxFlankLength": -1,
1057     "maxSize": 14, "fittingStages": [
1058         { "optimizeFlankLength": true           },
1059         { "optimizeMotifShiftHeuristic": true },
1060         { "optimizeSizeHeuristic": true           } ] },
1061 {"function": "outputDB", "fit_id": fitID }
1062 ]
```

### 1063 ***TF binding models, multiple experiments***

1064 To learn a unified TF binding model from multiple SELEX datasets, the above three settings were modified to  
1065 load and model multiple count tables. For example, the first setting was changed to be

```
1066 [
1067 {"function": "optimizerSetting", "lambdaL2": 1e-6, "pseudocount": 20,
1068     "likelihoodThreshold": 0.0002, "nThreads": 20 },
1069 {"function": "addTableDB", "count_table_id": tableId1 },
1070 {"function": "addTableDB", "count_table_id": tableId2 },
1071 ...
1072 {"function": "addSELEX" },
1073 {"function": "addSELEX" },
1074 ...
1075 {"function": "addNS" },
1076 {"function": "addBindingMode", "size": 12, "flankLength": 5 },
1077 {"function": "addBindingMode", "size": 12, "flankLength": 5 },
```

```
1078 {"function": "bindingModeConstraints", "index": 1, "maxFlankLength": -1,
1079      "maxSize": 18, "fittingStages": [
1080        { "optimizeFlankLength": true      },
1081        { "optimizeMotifShiftHeuristic": true },
1082        { "optimizeSizeHeuristic": true    } ] },
1083 {"function": "bindingModeConstraints", "index": 2, "maxFlankLength": -1,
1084      "maxSize": 18, "fittingStages": [
1085        { "optimizeFlankLength": true      },
1086        { "optimizeMotifShiftHeuristic": true },
1087        { "optimizeSizeHeuristic": true    } ] },
1088 {"function": "outputDB", "fit_id": fitID }
1089 ]
```

1090 Here one call to addSELEX is added each count table loaded using addTableDB.

### 1091 **Combinatorial SELEX**

1092 The Hth-Exd-Ubx CombSELEX-seq experiment was analyzed using following settings:

```
1093 [
1094 {"function": "optimizerSetting", "nThreads": 20, "lambdaL2": 1e-6 },
1095 {"function": "lbfgsSettings", "maxIters": 1000},
1096 {"function": "addSELEXTableDB", "count_table_id": 2600,
1097      "bindingModes": [0, 1, 2, 3, 4 ],
1098      "bindingModeInteractions": [-1] },
1099 {"function": "addSELEXTableDB", "count_table_id": 2703,
1100      "bindingModes": [0, 1, 2, 3  ],
1101      "bindingModeInteractions": [] },
1102 {"function": "addSELEXTableDB", "count_table_id": 2702,
1103      "bindingModes": [0,      3  ],
1104      "bindingModeInteractions": [] },
1105 {"function": "addSELEXTableDB", "count_table_id": 5653,
1106      "bindingModes": [0,  2,    ],
1107      "bindingModeInteractions": [] },
1108 {"function": "addSELEXTableDB", "count_table_id": 2680,
1109      "bindingModes": [0,      4  ],
1110      "bindingModeInteractions": [] },
1111 {"function": "addNS" },
1112 {"function": "addBindingMode", "size": 13, "flankLength": 7,
1113      "dinucleotideDistance": 1 },
1114 {"function": "addBindingMode", "size": 8,  "flankLength": 5,
1115      "dinucleotideDistance": 1 },
1116 {"function": "addBindingMode", "size": 8,  "flankLength": 5,
1117      "dinucleotideDistance": 1 },
1118 {"function": "addBindingMode", "size": 8,  "flankLength": 5,
1119      "dinucleotideDistance": 1 },
1120 {"function": "bindingModeSeed", "index": 1,
1121      "mononucleotideIUPAC": "NATGATTTATGAN" },
1122 {"function": "bindingModeSeed", "index": 2,
1123      "mononucleotideIUPAC": "NTTATGGN"  },
1124 {"function": "bindingModeSeed", "index": 3,
```



```
1125     "mononucleotideIUPAC": "NTTGAYRN"    },
1126 {"function": "bindingModeSeed", "index": 4,
1127     "mononucleotideIUPAC": "NNTGAYRN"    },
1128 {"function": "addInteraction", "bindingModes": [1,4], "positionBias": false,
1129     "maxOverlap": 8 },
1130 {"function": "interactionConstraints", "index": 0,
1131     "experimentSpecificInteraction": true },
1132 {"function": "outputDB", "fit_id": 19565 }
1133 ]
```

1134 Here each SELEX enrichment model is configured to include the appropriate binding modes and interactions, as  
1135 indicated in Figure S2a. The interaction corresponds to the Hth-Exd-Ubx complex. An initial unseeded fit (not  
1136 shown) was used to determine consensus sequence for each TF/complex, but some modes had unfavorable offsets in  
1137 the PSAMs. In the final fit (above), the PSAMs were therefore seeded to have the sequence recognition in the center.

### 1138 **meCpG EpiSELEX-seq for ATF4 and CEBP $\gamma$**

1139 The meCpG EpiSELEX-seq data for ATF4/CEBP $\gamma$  was analyzed using the following settings:

```
1140 [
1141 {"function": "optimizerSetting", "lambdaL2": 1e-6, "nThreads": 20 },
1142 {"function": "addTableDB", "count_table_id": 3218,
1143     "transliterate": { "in": [], "out": [] }},
1144 {"function": "addTableDB", "count_table_id": 3219,
1145     "transliterate": { "in": ["CG"], "out": ["cg"]}},
1146 {"function": "addTableDB", "count_table_id": 3224,
1147     "transliterate": { "in": [], "out": [] }},
1148 {"function": "addTableDB", "count_table_id": 3225,
1149     "transliterate": { "in": ["CG"], "out": ["cg"]}},
1150 {"function": "addTableDB", "count_table_id": 3246,
1151     "transliterate": { "in": [], "out": [] }},
1152 {"function": "addTableDB", "count_table_id": 3247,
1153     "transliterate": { "in": ["CG"], "out": ["cg"]}},
1154 {"function": "addSELEX", "bindingModes": [0, 1 ] },
1155 {"function": "addSELEX", "bindingModes": [0, 1 ] },
1156 {"function": "addSELEX", "bindingModes": [0, 2 ] },
1157 {"function": "addSELEX", "bindingModes": [0, 2 ] },
1158 {"function": "addSELEX", "bindingModes": [0, 1, 2, 3] },
1159 {"function": "addSELEX", "bindingModes": [0, 1, 2, 3] },
1160 {"function": "setAlphabet", "letterComplement": "C-G,A-T,c-g",
1161     "letterOrder": "ACGTcg" },
1162 {"function": "addNS" },
1163 {"function": "addBindingMode", "size": 12, "flankLength": 3,
1164     "dinucleotideDistance": 1 },
1165 {"function": "addBindingMode", "size": 12, "flankLength": 3,
1166     "dinucleotideDistance": 1 },
1167 {"function": "addBindingMode", "size": 12, "flankLength": 3,
1168     "dinucleotideDistance": 1 },
1169 {"function": "bindingModeSeed", "index": 1,
1170     "mononucleotideIUPAC": "NNTGACGTCANN" },
1171 {"function": "bindingModeSeed", "index": 2,
```

```
1172     "mononucleotideIUPAC": "NNTTGC GCAANN" },
1173 {"function": "bindingModeSeed", "index": 3,
1174     "mononucleotideIUPAC": "NNTTGCATCANN" },
1175 {"function": "symmetry", "index": 1, "symmetryString": "1:12:1" },
1176 {"function": "symmetry", "index": 2, "symmetryString": "1:12:1" },
1177 {"function": "bindingModeConstraints", "index": 1,
1178     "fittingStages": [ { "optimizeFlankLength": true } ],
1179     "maxFlankLength": -1 },
1180 {"function": "bindingModeConstraints", "index": 2,
1181     "fittingStages": [ { "optimizeFlankLength": true } ],
1182     "maxFlankLength": -1 },
1183 {"function": "bindingModeConstraints", "index": 3,
1184     "fittingStages": [ { "optimizeFlankLength": true } ],
1185     "maxFlankLength": -1 },
1186 {"function": "outputDB", "fit_id": 9458 }
1187 ]
```

1188 Here, only the appropriate binding modes are included in each experiment (as indicated in Figure S3b) and CG  
1189 is transliterated to cg in the modified libraries to encode meCpG. The PSAMs were seeded (based on an earlier  
1190 unseeded fit) to have the sequence recognition at the center, and the homodimer binding modes were constrained to  
1191 be reverse-complement symmetric.

#### 1192 **meCpG, 5hmC and 6mA EpiSELEX-seq for CEBP $\gamma$**

1193 The meCpG-, 5hmC-, and 6mA-aware binding model for CEBP $\gamma$  was learned using the following settings:

```
1194 [
1195 {"function": "optimizerSetting", "lambdaL2": 1e-6, "nThreads": 20 },
1196 {"function": "addTableDB", "count_table_id": 3224,
1197     "transliterate": { "in": [], "out": [] } },
1198 {"function": "addTableDB", "count_table_id": 3225,
1199     "transliterate": { "in": ["CG"], "out": ["dh"] } },
1200 {"function": "addTableDB", "count_table_id": 3227,
1201     "transliterate": { "in": ["C"], "out": ["c"] } },
1202 {"function": "addTableDB", "count_table_id": 3226,
1203     "transliterate": { "in": ["A"], "out": ["a"] } },
1204 {"function": "addSELEX" },
1205 {"function": "addSELEX" },
1206 {"function": "addSELEX" },
1207 {"function": "addSELEX" },
1208 {"function": "setAlphabet", "letterComplement": "C-G,A-T,a-t,c-g,d-h",
1209     "letterOrder": "ACGTacgtdh" },
1210 {"function": "addNS" },
1211 {"function": "addBindingMode", "size": 12, "flankLength": 3,
1212     "dinucleotideDistance": 1 },
1213 {"function": "bindingModeSeed", "index": 1,
1214     "mononucleotideIUPAC": "NNTTGC GCAANN"},
1215 {"function": "bindingModeConstraints", "index": 1,
1216     "fittingStages": [ { "optimizeFlankLength": true } ],
1217     "maxFlankLength": -1 },
1218 {"function": "symmetry", "index": 1, "symmetryString": "1:12:1"},
```

```
1219 {"function": "outputDB", "fit_id": 12707 }
1220 ]
```

1221 These settings encode meCpG as dh, 5hmC:G as c (g on the reverse strand), and 6mA:T as a (t on the reverse  
1222 strand). While this encoding differs from that displayed in Figure S3a, it is straightforward to update the encoding of  
1223 the binding model.

#### 1224 **RNA-binding proteins**

1225 The RNA Bind-N-seq data for RBFOX2 was analyzed using the following settings:

```
1226 [
1227 {"function": "optimizerSetting", "nThreads": 20, "lambdaL2": 1e-6,
1228     "pseudocount": 200 },
1229 {"function": "lbfgsSettings", "maxIters": 1000 },
1230 {"function": "addTableDB", "count_table_id": 2479 },
1231 {"function": "addTableDB", "count_table_id": 2483 },
1232 {"function": "addTableDB", "count_table_id": 2478 },
1233 {"function": "addTableDB", "count_table_id": 2482 },
1234 {"function": "addTableDB", "count_table_id": 2477 },
1235 {"function": "addTableDB", "count_table_id": 2481 },
1236 {"function": "addTableDB", "count_table_id": 2476 },
1237 {"function": "addTableDB", "count_table_id": 2480 },
1238 {"function": "addTableDB", "count_table_id": 2484 },
1239 {"function": "addSELEX", "bindingSaturation": true, "concentration": 1  },
1240 {"function": "addSELEX", "bindingSaturation": true, "concentration": 4  },
1241 {"function": "addSELEX", "bindingSaturation": true, "concentration": 14 },
1242 {"function": "addSELEX", "bindingSaturation": true, "concentration": 40 },
1243 {"function": "addSELEX", "bindingSaturation": true, "concentration": 121 },
1244 {"function": "addSELEX", "bindingSaturation": true, "concentration": 365 },
1245 {"function": "addSELEX", "bindingSaturation": true, "concentration": 1100},
1246 {"function": "addSELEX", "bindingSaturation": true, "concentration": 3300},
1247 {"function": "addSELEX", "bindingSaturation": true, "concentration": 9800},
1248 {"function": "addNS" },
1249 {"function": "addBindingMode", "size": 10, "flankLength": 6,
1250     "singleStrand": true, "dinucleotideDistance": 10 },
1251 {"function": "bindingModeConstraints", "index": 1,
1252     "roundSpecificActivity": false,
1253     "experimentSpecificActivity": false },
1254 {"function": "bindingModeSeed", "index": 1,
1255     "mononucleotideString": "..TGCATG.."},
1256 {"function": "outputDB", "fit_id": 16567 }
1257 ]
```

1258 Here the SELEX model constrained the experiment-specific activities to be proportional to the RBP concentrations  
1259 used in each experiment, and the binding mode was configured include all-by-all interactions and to only score the  
1260 forward strand. The 1nM, 4nM and 14nM experiments have very weak binding enrichment and are not shown in  
1261 Figure S5f.

#### 1262 **$K_D$ -seq - single experiment**

1263 The single-concentration  $K_D$  analyses used the following configuration:

```
1264 [
1265 { "function": "optimizerSetting", "lambdaL2": 1e-6, "nThreads": 20,
1266     "pseudocount": 200 },
1267 { "function": "lbfgsSettings", "maxIters": 1000},
1268 { "function": "addTableDB", "count_table_id": 5137 },
1269 { "function": "addSELEX", "modelType": "RhoGamma", "concentration": 100,
1270     "cumulativeEnrichment": false },
1271 { "function": "addNS" },
1272 { "function": "addBindingMode", "size": 10, "flankLength": 6,
1273     "dinucleotideDistance": 10 },
1274 { "function": "bindingModeConstraints", "index": 0,
1275     "roundSpecificActivity": false },
1276 { "function": "bindingModeConstraints", "index": 1,
1277     "roundSpecificActivity": false },
1278 { "function": "enrichmentModelSeed", "index": 0, "rho": [0,1,0],
1279     "gamma": [0,-1,-1] },
1280 { "function": "bindingModeSeed", "index": 1,
1281     "mononucleotideString": "..TAATTG.." },
1282 { "function": "outputDB", "fit_id": 16609 }
1283 ]
```

#### 1284 *K<sub>D</sub>-seq - multiple experiments*

1285 The multi-concentration  $K_D$  analyses of the Input/Bound/Free libraries used the following configuration:

```
1286 [
1287 { "function": "optimizerSetting", "lambdaL2": 1e-6, "nThreads": 20,
1288     "pseudocount": 1000 },
1289 { "function": "addTableDB", "count_table_id": 5134 },
1290 { "function": "addTableDB", "count_table_id": 5135 },
1291 { "function": "addTableDB", "count_table_id": 5136 },
1292 { "function": "addTableDB", "count_table_id": 5137 },
1293 { "function": "addSELEX", "modelType": "RhoGamma", "concentration": 3300,
1294     "cumulativeEnrichment": false },
1295 { "function": "addSELEX", "modelType": "RhoGamma", "concentration": 1000,
1296     "cumulativeEnrichment": false },
1297 { "function": "addSELEX", "modelType": "RhoGamma", "concentration": 330,
1298     "cumulativeEnrichment": false },
1299 { "function": "addSELEX", "modelType": "RhoGamma", "concentration": 100,
1300     "cumulativeEnrichment": false },
1301 { "function": "addNS" },
1302 { "function": "addBindingMode", "size": 10, "flankLength": 6,
1303     "dinucleotideDistance": 10 },
1304 { "function": "bindingModeConstraints", "index": 0,
1305     "roundSpecificActivity": false,
1306     "experimentSpecificActivity": false },
1307 { "function": "bindingModeConstraints", "index": 1,
1308     "roundSpecificActivity": false,
1309     "experimentSpecificActivity": false },
1310 { "function": "enrichmentModelSeed", "rho": [0,1,0],
1311     "gamma": [0,-1,-1] },
```

```
1312 { "function": "bindingModeSeed", "index": 1,  
1313       "mononucleotideString": "..TAATTG.."},  
1314 { "function": "outputDB", "fit_id": 19357 }  
1315 ]
```

1316 The analyses that instead analyzed the Input/Bound and Bound/Free libraries used the same configuration but with  
1317 the arguments "modeledColumns": [0,1] and "modeledColumns": [1,2], respectively, added to  
1318 addTableDB.

### 1319 **Peak-free ChIP-seq motif discovery - single experiment**

1320 The binding models for GR and its cofactors were learned from ChIP-seq data using the following settings:

```
1321 [  
1322 {"function": "optimizerSetting", "lambdaL2": 1e-6, "pseudocount": 20,  
1323   "nThreads": 20 },  
1324 {"function": "addTableDB", "count_table_id": 4974 },  
1325 {"function": "addSELEX", "modelType": "SELEX",  
1326   "cumulativeEnrichment": true },  
1327 {"function": "addNS" },  
1328 {"function": "addBindingMode", "size": 15, "flankLength": 0,  
1329   "dinucleotideDistance": 0, "positionBias": true },  
1330 {"function": "addBindingMode", "size": 10, "flankLength": 0,  
1331   "dinucleotideDistance": 0, "positionBias": true },  
1332 {"function": "addBindingMode", "size": 10, "flankLength": 0,  
1333   "dinucleotideDistance": 0, "positionBias": true },  
1334 {"function": "addBindingMode", "size": 10, "flankLength": 0,  
1335   "dinucleotideDistance": 0, "positionBias": true },  
1336 {"function": "bindingModeSeed", "index": 1,  
1337   "mononucleotideString": "AG.ACA...TGT.CT" },  
1338 {"function": "symmetry", "index": 1,  
1339   "symmetryString": "abcdefghijklGFEDCBA" },  
1340 {"function": "bindingModeConstraints", "index": 1,  
1341   "positionBiasBinWidth": 5 },  
1342 {"function": "bindingModeConstraints", "index": 2, "maxSize": 18,  
1343   "positionBiasBinWidth": 5, "fittingStages": [  
1344     { "optimizeMotifShiftHeuristic": true },  
1345     { "optimizeSize": true } ] },  
1346 {"function": "bindingModeConstraints", "index": 3, "maxSize": 18,  
1347   "positionBiasBinWidth": 5, "fittingStages": [  
1348     { "optimizeMotifShiftHeuristic": true },  
1349     { "optimizeSize": true } ] },  
1350 {"function": "bindingModeConstraints", "index": 4, "maxSize": 18,  
1351   "positionBiasBinWidth": 5, "fittingStages": [  
1352     { "optimizeMotifShiftHeuristic": true },  
1353     { "optimizeSize": true } ] },  
1354 {"function": "outputDB", "fit_id": 14540 }  
1355 ]
```

1356 Here the GR binding mode was configured to be reverse-complement symmetric.

1357 **Peak-free ChIP-seq motif discovery - multiple agonist treatments**

1358 The impact of CORT treatment GR binding was quantified using the following settings:

```
1359 [  
1360 {"function": "addTableDB", "count_table_id": 4873 },  
1361 {"function": "addTableDB", "count_table_id": 4874 },  
1362 {"function": "addTableDB", "count_table_id": 4875 },  
1363 {"function": "addSELEX" },  
1364 {"function": "addSELEX" },  
1365 {"function": "addSELEX" },  
1366 {"function": "addNS" },  
1367 {"function": "addBindingMode", "size": 15, "flankLength": 0,  
1368     "dinucleotideDistance": 0 },  
1369 {"function": "optimizerSetting", "lambdaL2": 1e-6 },  
1370 {"function": "bindingModeConstraints", "index": 1,  
1371     "roundSpecificActivity": true,  
1372     "experimentSpecificActivity": true },  
1373 {"function": "bindingModeSeed", "index": 1,  
1374     "mononucleotideString": "AG.ACA...TGT.CT" },  
1375 {"function": "symmetry", "index": 1,  
1376     "symmetryString": "abcdefghijklGFEDCBA" },  
1377 {"function": "outputDB", "fit_id": 10057 }  
1378 ]
```

1379 Here the binding mode is configured to have independent activities in each experiment.

1380 **Kinase sequence specificity**

1381 The peptide-sequence specificity of tyrosine kinase Src was quantified using the following settings:

```
1382 [  
1383 {"function": "optimizerSetting", "nThreads": 20, "lambdaL2": 1e-6,  
1384     "pseudocount": 50 },  
1385 {"function": "lbfgsSettings", "maxIters": 2000 },  
1386 {"function": "addTableDBs", "count_table_ids": [4831,4830,4832] },  
1387 {"function": "addSELEX", "modelType": "ExponentialKinetics",  
1388     "concentration": 0.25 },  
1389 {"function": "addSELEX", "modelType": "ExponentialKinetics",  
1390     "concentration": 1 },  
1391 {"function": "addSELEX", "modelType": "ExponentialKinetics",  
1392     "concentration": 3 },  
1393 {"function": "setAlphabet", "letterComplement":  
1394     "A-A,C-C,D-D,E-E,F-F,G-G,H-H,I-I,K-K,L-L,M-M,N-N,P-P,Q-Q, \\\  
1395     R-R,S-S,T-T,V-V,W-W,Y-Y",  
1396     "letterOrder": "ACDEFGHIKLMNPQRSTUVWXYZ" },  
1397 {"function": "addNS" },  
1398 {"function": "addBindingMode", "size": 7, "flankLength": 3,  
1399     "singleStrand": true, "dinucleotideDistance": 7},  
1400 {"function": "bindingModeConstraints", "index": 1,  
1401     "experimentSpecificActivity": false },  
1402 {"function": "symmetry", "index": 1, "symmetryString": "abc.efg" },  
1403 {"function": "bindingModeSeed", "index": 1,
```

```
1404     "mononucleotideString": "...Y...",
1405     "seedScale": 10 },
1406 {"function": "enrichmentModelConstraints", "index": -1,
1407     "fitDelta": [false, false]},
1408 {"function": "enrichmentModelSeed", "index": -1, "delta": [0,-15] },
1409 {"function": "outputDB", "fit_id": 16581 }
1410 ]
```

1411 Here the `concentration` setting was used to encode the different exposures of the experiments (5min, 20min  
1412 and 60min were encoded as 0.25, 1, and 3) and an extended and self-complementary alphabet was used to represent  
1413 peptides. The binding mode was configured to include all-by-all interactions between the peptides and only the  
1414 forward strand was scored. The commands `bindingModeSeed` and `symmetry` were used to fix the central  
1415 position to recognize Y.
